# Supplementary material for: Single-Cell Transcriptome Analysis Reveals Development-Specific Networks at Distinct Antral Follicle Stages in Sheep Oocytes
Source: Preprints.org preprint supplement (doi:10.20944/preprints202311.0180.v1), 2023-11-02
Supplement: Supplementary file 1 [file supplementary]

## Sheet: Table S1
Table S1. Demonstrating numbers of oocytes at three antral follicle stages.
	Small (< 3 mm)			Medium (3–6 mm)			Large (˃ 6 mm)
Sample	SO_1	SO_2	SO_3	MO_1	MO_2	MO_3	LO_1	LO_2	LO_3
Oocyte	13	14	16	16	20	19	11	14	13

## Sheet: Table S2
Table S2. Statistics of sequencing quality for the mRNA libraries
Sample	Raw Data		Valid Data		Valid Ratio(reads)	Q20%	Q30%	GC content%
LO_1	38169772	5.73G	34648910	5.20G	90.78	99.94	98.17	47
LO_2	41071024	6.16G	37612420	5.64G	91.58	99.95	98.25	47
LO_3	41279110	6.19G	36959548	5.54G	89.54	99.93	98.07	47
MO_1	41791374	6.27G	38184162	5.73G	91.37	99.95	98.57	48
MO_2	39889036	5.98G	36218716	5.43G	90.8	99.95	98.58	47
MO_3	43231296	6.48G	39484132	5.92G	91.33	99.95	98.57	48
SO_1	42322572	6.35G	37250286	5.59G	88.02	99.96	98.72	47
SO_2	42265062	6.34G	37464070	5.62G	88.64	99.96	98.63	47
SO_3	42008004	6.30G	37156838	5.57G	88.45	99.95	98.45	47

## Sheet: Table S3
	Table S3. Top 10 genes identified as SO, MO, and LO markers, ranked according to p-values
Group	Gene name	Description	log2FC	p-value
Top 10 transcripts overrepresented in SO oocyte
SO VS. LO	FAM133B	family with sequence similarity 133 member B	2.13	0
	DYNLL2	dynein light chain LC8-type 2	2.06	0
	DDX3X	DEAD-box helicase 3 X-linked	2.04	0
	KBTBD8	kelch repeat and BTB domain containing 8	2.98	0
	INPP5F	inositol polyphosphate-5-phosphatase F	2.39	0
	ZNF200	zinc finger protein 200	2.27	4.6e-172
	FRMD6	FERM domain containing 6	2.79	2.5e-145
	GOLT1A	golgi transport 1A	3.44	2.2e-95
MO VS. SO	MCUR1	mitochondrial calcium uniporter regulator 1	-2.15	2.5e-44
	MICAL1	microtubule associated monooxygenase, calponin and LIM domain containing 1	-2.04	3.4e-44
Top 10 transcripts overrepresented in MO oocyte
MO VS. SO	RARRES2	retinoic acid receptor responder 2	3.29	2.4e-73
	NDUFA4L2	NDUFA4 mitochondrial complex associated like 2	4.68	2.5e-57
	SRGN	serglycin	6.13	1.1e-46
	FOS	Ovis aries Fos proto-oncogene	6.06	8.9e-46
	HSPB1	heat shock protein family B (small) member 1	2.95	1.4e-42
	TIMP3	TIMP metallopeptidase inhibitor 3	4.59	1.3e-38
	UPK1B	uroplakin 1B	2.5	1.3e-38
	PLA2G7	phospholipase A2 group VII	2.66	1.5e-36
MO VS. LO	KBTBD8	kelch repeat and BTB domain containing 8	2.61	9e-257
	LTN1	listerin E3 ubiquitin protein ligase 1	2.08	3.5e-43
Top 10 transcripts overrepresented in LO oocyte
SO VS. LO	INHBA	inhibin subunit beta A	-7.1	0
	SRGN	serglycin	-7.85	0
	BEX3	protein BEX3	-5.58	0
	PDIA6	protein disulfide isomerase family A member 6	-2.55	0
	UPK1B	uroplakin 1B	-3.84	0
	GAPDH	Ovis aries glyceraldehyde-3-phosphate dehydrogenase	-2.39	0
	FST	Ovis aries follistatin (FST), mRNA.	-6.66	0
	SERPINE2	serpin family E member 2	-3.77	0
	SQSTM1	Ovis aries sequestosome 1 (SQSTM1), mRNA.	-2.6	0
MO VS. LO	UHRF1	ubiquitin like with PHD and ring finger domains 1	-2.22	7.9e-144

## Sheet: Table S4
Table S4. 208 stage-specific expression genes of large antral follicle
gene_id	gene_name	Description	trans_type	FPKM.LO_1	FPKM.LO_2	FPKM.LO_3	FPKM.MO_1	FPKM.MO_2	FPKM.MO_3	FPKM.SO_1	FPKM.SO_2	FPKM.SO_3	pval	qval	significant
ENSOARG00020016204	INHA	Ovis aries inhibin subunit alpha (INHA), mRNA. [Source:RefSeq mRNA;Acc:NM_001308579]	protein_coding	159.949	165.413	162.868	8.02261	12.6748	8.46068	0.61016	0.129146	0.34154	0	0	yes
ENSOARG00020010160	RARRES2	retinoic acid receptor responder 2 [Source:HGNC Symbol;Acc:HGNC:9868]	protein_coding	656.97	698.898	664.034	90.317	131.889	107.907	11.8516	10.443	11.3755	0	0	yes
ENSOARG00020005389	VIM	vimentin [Source:NCBI gene (formerly Entrezgene);Acc:443105]	protein_coding	134.849	138.43	133.666	13.9983	22.5294	17.9103	2.69731	3.72139	2.47727	1.65245e-234	5.10319e-231	yes
ENSOARG00020023741	HSD17B1	hydroxysteroid 17-beta dehydrogenase 1 [Source:NCBI gene (formerly Entrezgene);Acc:101110778]	protein_coding	139.995	148.087	140.433	13.6533	16.2669	17.6495	1.22569	0.966076	2.59843	3.81819e-189	7.86101e-186	yes
ENSOARG00020023827	HSPB1	heat shock protein family B (small) member 1 [Source:NCBI gene (formerly Entrezgene);Acc:101115754]	protein_coding	62.9802	76.4813	72.6238	18.1702	18.8111	15.2479	2.1556	1.9082	2.67219	2.40307e-179	4.24074e-176	yes
ENSOARG00020019151	ENO1	enolase 1 [Source:NCBI gene (formerly Entrezgene);Acc:101118119]	protein_coding	314.297	310.37	301.216	51.1794	80.3767	65.7678	12.9404	17.7533	18.952	5.44071e-165	6.72091e-162	yes
ENSOARG00020015221	OBSL1	obscurin like cytoskeletal adaptor 1 [Source:NCBI gene (formerly Entrezgene);Acc:101114594]	protein_coding	4.54957	4.96983	4.76135	0.396252	0.271379	0.276528	0.102891	0.0425073	0.0886457	1.70085e-155	1.91005e-152	yes
ENSOARG00020005304	TNNI3	troponin I3, cardiac type [Source:NCBI gene (formerly Entrezgene);Acc:101121961]	protein_coding	392.993	393.425	368.288	53.7619	99.7571	70.2531	9.13358	12.8846	13.0675	3.32113e-154	3.41883e-151	yes
ENSOARG00020016508	EEF2	eukaryotic translation elongation factor 2 [Source:NCBI gene (formerly Entrezgene);Acc:101114105]	protein_coding	26.5382	27.9933	27.1805	4.41127	4.67314	3.9781	3.01851	2.42908	3.40408	1.82312e-147	1.60864e-144	yes
ENSOARG00020014950	CANX	calnexin [Source:NCBI gene (formerly Entrezgene);Acc:101122273]	protein_coding	83.1816	80.7487	75.8226	17.5762	21.0245	17.2135	15.9308	15.593	17.2976	7.69253e-147	6.33506e-144	yes
ENSOARG00020001582	NDUFA4L2	NDUFA4 mitochondrial complex associated like 2 [Source:NCBI gene (formerly Entrezgene);Acc:101123455]	protein_coding	391.967	395.394	388.548	59.0929	128.439	100.396	2.45818	4.15057	4.59502	2.65554e-141	1.64019e-138	yes
ENSOARG00020025428	CLEC3B	C-type lectin domain family 3 member B [Source:NCBI gene (formerly Entrezgene);Acc:101120024]	protein_coding	23.1208	31.1437	26.6319	3.21033	3.6759	3.59721	0	0.200457	0.092402	2.36819e-138	1.32974e-135	yes
ENSOARG00020019133	SERPINE2	serpin family E member 2 [Source:NCBI gene (formerly Entrezgene);Acc:101122004]	protein_coding	318.107	301.514	301.985	39.9587	72.8211	59.9827	21.4408	22.5812	23.3699	3.38819e-138	1.81975e-135	yes
ENSOARG00020014105	TLL2	tolloid like 2 [Source:NCBI gene (formerly Entrezgene);Acc:101107749]	protein_coding	17.2704	18.6169	16.7832	0.984225	2.27544	1.75767	0.090495	0.081806	0	1.24441e-128	5.69339e-126	yes
ENSOARG00020004157	GADD45G	growth arrest and DNA damage inducible gamma [Source:NCBI gene (formerly Entrezgene);Acc:100885762]	protein_coding	35.5527	34.6464	37.7881	5.2853	2.76476	3.97816	0	0.083997	0.323729	2.1241e-128	9.37107e-126	yes
ENSOARG00020011521	PLOD1	procollagen-lysine,2-oxoglutarate 5-dioxygenase 1 [Source:NCBI gene (formerly Entrezgene);Acc:101111306]	protein_coding	6.82823	6.62493	5.36682	0.921494	0.716678	0.981103	0	0	0	3.90829e-127	1.6648e-124	yes
ENSOARG00020011756	EPHX2	epoxide hydrolase 2 [Source:HGNC Symbol;Acc:HGNC:3402]	protein_coding	94.1474	95.7854	90.935	5.29505	13.5099	8.22586	0.503068	0.754918	1.10087	1.29482e-123	5.33165e-121	yes
ENSOARG00020023407	NEDD9	neural precursor cell expressed, developmentally down-regulated 9 [Source:NCBI gene (formerly Entrezgene);Acc:101105289]	protein_coding	7.17161	8.18215	7.85632	1.21493	2.23278	1.68923	0.0716342	0.122793	0.116092	1.32632e-120	5.12e-118	yes
ENSOARG00020013035	TRIB2	tribbles pseudokinase 2 [Source:NCBI gene (formerly Entrezgene);Acc:101121332]	protein_coding	11.3195	12.1013	12.7939	0.457905	0.788102	0.874726	0	0.177635	0.025062	8.08885e-104	2.37909e-101	yes
ENSOARG00020014530	GFRA3	GDNF family receptor alpha 3 [Source:NCBI gene (formerly Entrezgene);Acc:101109876]	protein_coding	127.758	119.92	125.206	7.45657	25.9582	16.5623	0.654718	0.757517	0.690238	1.3805e-102	3.78962e-100	yes
ENSOARG00020021281	LONP1	lon peptidase 1, mitochondrial [Source:NCBI gene (formerly Entrezgene);Acc:101109965]	protein_coding	16.8409	17.2423	16.8891	3.03136	3.37075	2.73185	3.8482	3.90505	4.16669	4.90149e-102	1.31626e-99	yes
ENSOARG00020007660	ST3GAL4	Ovis aries ST3 beta-galactoside alpha-2,3-sialyltransferase 4 (ST3GAL4), mRNA. [Source:RefSeq mRNA;Acc:NM_001112818]	protein_coding	70.7411	66.0167	69.6922	2.87823	9.3142	6.36021	0.654037	0.816598	0.908596	1.56325e-101	4.10868e-99	yes
ENSOARG00020005664	TPM2	tropomyosin 2 [Source:NCBI gene (formerly Entrezgene);Acc:101114931]	protein_coding	44.691	40.0059	41.8032	5.25253	10.6003	9.29662	1.49457	1.28611	1.68506	2.11609e-100	5.3347e-98	yes
ENSOARG00020005636	PROM1	prominin 1 [Source:NCBI gene (formerly Entrezgene);Acc:101107197]	protein_coding	15.3826	15.429	14.1338	2.53042	4.4091	3.7597	0.869009	0.895436	1.08018	2.64542e-97	6.28439e-95	yes
ENSOARG00020017701	RRAD	RRAD, Ras related glycolysis inhibitor and calcium channel regulator [Source:NCBI gene (formerly Entrezgene);Acc:101105434]	protein_coding	17.5023	14.2593	16.1165	1.14069	2.88028	1.71813	0	0	0	5.89258e-87	1.17405e-84	yes
ENSOARG00020003939	GPT	glutamic--pyruvic transaminase [Source:NCBI gene (formerly Entrezgene);Acc:106991334]	protein_coding	15.0387	15.5323	14.7959	2.02293	2.77692	2.00104	1.15427	1.57589	1.73083	3.09953e-85	5.7147e-83	yes
ENSOARG00020008460	SEMA6D	semaphorin 6D [Source:HGNC Symbol;Acc:HGNC:16770]	protein_coding	4.71786	4.51526	4.78504	0.262499	0.753374	0.598291	0	0	0	1.3879e-84	2.52129e-82	yes
ENSOARG00020015212	HNRNPH1	heterogeneous nuclear ribonucleoprotein H1 [Source:NCBI gene (formerly Entrezgene);Acc:101122518]	protein_coding	30.8095	31.72	27.7453	3.92461	6.61756	5.68003	3.32853	2.47825	2.94533	2.79259e-84	4.92813e-82	yes
ENSOARG00020016769	PGK1	Ovis aries phosphoglycerate kinase 1 (PGK1), mRNA. [Source:RefSeq mRNA;Acc:NM_001142516]	protein_coding	178.8	173.413	191.278	23.0881	51.2144	36.2843	14.033	14.6579	14.5312	3.52446e-84	6.0469e-82	yes
ENSOARG00020001322	RAB13	RAB13, member RAS oncogene family [Source:NCBI gene (formerly Entrezgene);Acc:101107746]	protein_coding	81.6579	86.0977	82.4689	13.0832	20.3777	17.6973	16.5879	16.9599	16.9454	2.86135e-81	4.53156e-79	yes
ENSOARG00020014833	AOX1	aldehyde oxidase 1 [Source:NCBI gene (formerly Entrezgene);Acc:101104557]	protein_coding	4.66047	4.06929	4.28036	0.502566	0.978157	0.62403	0.095484	0.119933	0.077958	8.37097e-79	1.2024e-76	yes
ENSOARG00020001909	LOXL3	lysyl oxidase like 3 [Source:NCBI gene (formerly Entrezgene);Acc:101119969]	protein_coding	9.12587	9.17211	9.5673	0.455901	1.33304	1.13563	0.114465	0.169809	0.152778	1.17396e-78	1.66689e-76	yes
ENSOARG00020023984	MAGED2	melanoma-associated antigen D2 [Source:NCBI gene (formerly Entrezgene);Acc:101116800]	protein_coding	11.2458	13.1122	10.8972	0.628186	2.22349	1.27618	0	0	0	1.32233e-77	1.73774e-75	yes
ENSOARG00020023805	TKT	transketolase [Source:NCBI gene (formerly Entrezgene);Acc:101107229]	protein_coding	24.8992	23.1742	25.295	2.8523	4.89011	3.72842	4.41341	4.49997	4.11213	4.45162e-77	5.66916e-75	yes
ENSOARG00020013121	MVD	mevalonate diphosphate decarboxylase [Source:NCBI gene (formerly Entrezgene);Acc:101106706]	protein_coding	12.7931	13.3821	14.5443	2.21697	1.5871	2.0079	1.18848	1.52922	1.29186	4.8256e-75	5.67721e-73	yes
ENSOARG00020019567	COLQ	collagen like tail subunit of asymmetric acetylcholinesterase [Source:HGNC Symbol;Acc:HGNC:2226]	protein_coding	5.75075	6.25692	5.47094	0.483779	0.298021	0.53778	0.043125	0	0.121404	7.13763e-74	7.94335e-72	yes
ENSOARG00020023276	BEX3	protein BEX3 [Source:NCBI gene (formerly Entrezgene);Acc:101117650]	protein_coding	247.976	245.225	254.646	19.9103	64.4811	43.3753	5.42037	5.80338	4.42894	2.86471e-73	3.05067e-71	yes
ENSOARG00020012029	MAGED1	MAGE family member D1 [Source:NCBI gene (formerly Entrezgene);Acc:101122575]	protein_coding	14.1989	14.3388	12.9188	0.860187	1.97674	1.15403	0.221423	0.178875	0.49135	1.60679e-72	1.66796e-70	yes
ENSOARG00020001760	LTBP1	latent transforming growth factor beta binding protein 1 [Source:HGNC Symbol;Acc:HGNC:6714]	protein_coding	29.3802	30.0973	29.1283	4.12296	7.24468	5.68559	7.26944	7.40815	6.62648	2.00888e-72	2.06798e-70	yes
ENSOARG00020010134	CCND2	cyclin D2 [Source:NCBI gene (formerly Entrezgene);Acc:100147799]	protein_coding	118.398	122.851	125.112	17.2797	46.3531	27.2864	0.391516	1.46449	0.817238	2.23718e-72	2.26524e-70	yes
ENSOARG00020009600	ATP6V1C2	ATPase H+ transporting V1 subunit C2 [Source:NCBI gene (formerly Entrezgene);Acc:101103310]	protein_coding	17.3876	17.7595	15.5597	1.28217	3.33575	1.90038	0.171079	0.18172	0.428082	5.18325e-70	4.81419e-68	yes
ENSOARG00020005926	PPIC	peptidylprolyl isomerase C [Source:NCBI gene (formerly Entrezgene);Acc:101111017]	protein_coding	22.2585	18.6746	18.1565	3.15843	4.72861	4.66284	0.542172	0.976114	0.600685	5.34867e-70	4.93075e-68	yes
ENSOARG00020003280	FST	Ovis aries follistatin (FST), mRNA. [Source:RefSeq mRNA;Acc:NM_001257093]	protein_coding	1426.77	1422.46	1444.56	34.2676	177.857	103.424	12.7718	15.3984	14.2435	2.42637e-69	2.15633e-67	yes
ENSOARG00020022582	AMH	Ovis aries anti-Mullerian hormone (AMH), mRNA. [Source:RefSeq mRNA;Acc:NM_001308599]	protein_coding	13.3597	15.3675	13.5642	2.12298	1.17533	2.2084	0.060149	0.284777	0.383233	3.47128e-69	3.03189e-67	yes
ENSOARG00020024744	HERPUD1	homocysteine inducible ER protein with ubiquitin like domain 1 [Source:NCBI gene (formerly Entrezgene);Acc:101121537]	protein_coding	59.7774	58.4758	59.238	9.49565	18.4108	12.8827	0.207047	0.413407	1.05118	4.24554e-69	3.6675e-67	yes
ENSOARG00020009895	SCARA3	scavenger receptor class A member 3 [Source:NCBI gene (formerly Entrezgene);Acc:101107766]	protein_coding	1.49412	2.13794	2.11818	0	0	0	0.0607876	0.0389911	0.0534845	9.27265e-67	7.39e-65	yes
ENSOARG00020009039	MDP1	magnesium-dependent phosphatase 1 [Source:NCBI gene (formerly Entrezgene);Acc:101115461]	protein_coding	13.553	12.3687	14.3059	3.33658	3.22639	2.96324	0.08792	0	0.250993	1.67299e-65	1.23751e-63	yes
ENSOARG00020024847	GPAT4	glycerol-3-phosphate acyltransferase 4 [Source:NCBI gene (formerly Entrezgene);Acc:101117217]	protein_coding	30.257	29.0335	30.6417	7.32614	4.29617	5.25895	4.67476	6.1807	5.19222	3.11718e-65	2.26509e-63	yes
ENSOARG00020015025	NR5A2	nuclear receptor subfamily 5 group A member 2 [Source:NCBI gene (formerly Entrezgene);Acc:100653388]	protein_coding	5.79701	5.86419	5.87053	0.805956	0.622821	0.336417	0.118075	0.106793	0.0509536	8.0232e-65	5.79594e-63	yes
ENSOARG00020006870	PFKL	phosphofructokinase, liver type [Source:NCBI gene (formerly Entrezgene);Acc:443164]	protein_coding	6.07876	6.43366	5.37732	0.496979	0.402457	0.164929	0.0865621	0.229272	0.12122	2.23638e-64	1.60616e-62	yes
ENSOARG00020025751	ASPH	aspartate beta-hydroxylase [Source:HGNC Symbol;Acc:HGNC:757]	protein_coding	6.90054	6.23602	4.68433	0.752721	1.32528	1.29565	0.263391	0.191463	0.315278	3.47959e-64	2.45619e-62	yes
ENSOARG00020021932	RRBP1	ribosome binding protein 1 [Source:NCBI gene (formerly Entrezgene);Acc:101121793]	protein_coding	10.0226	10.0058	10.0414	1.73038	2.62669	2.26696	2.36564	2.45968	2.56621	3.55549e-64	2.48141e-62	yes
ENSOARG00020009931	CALR	calreticulin [Source:NCBI gene (formerly Entrezgene);Acc:101104396]	protein_coding	49.3124	45.2188	44.9079	5.16574	10.5543	5.98538	5.70108	6.59232	6.15093	5.85118e-64	4.06066e-62	yes
ENSOARG00020017354	YBX2	Y-box binding protein 2 [Source:NCBI gene (formerly Entrezgene);Acc:101118116]	protein_coding	68.9994	73.3172	70.7597	21.5737	14.0277	17.6291	14.4815	17.0847	17.6369	1.58287e-63	1.09236e-61	yes
ENSOARG00020009823	PDIA6	protein disulfide isomerase family A member 6 [Source:NCBI gene (formerly Entrezgene);Acc:101119193]	protein_coding	170.951	166.687	161.66	21.6404	44.7961	33.19	29.0636	28.6672	27.5455	1.72978e-63	1.18711e-61	yes
ENSOARG00020002004	PTGES	prostaglandin E synthase [Source:NCBI gene (formerly Entrezgene);Acc:101104140]	protein_coding	36.6565	39.6673	42.7233	8.8465	7.15569	7.38654	1.38581	0.537924	0.166402	1.79187e-63	1.22293e-61	yes
ENSOARG00020004942	SART3	spliceosome associated factor 3, U4/U6 recycling protein [Source:HGNC Symbol;Acc:HGNC:16860]	protein_coding	13.75	17.0775	17.572	2.33376	3.66563	3.20303	2.31402	2.81688	1.93689	6.24531e-63	4.21576e-61	yes
ENSOARG00020016612	ADM	adrenomedullin [Source:HGNC Symbol;Acc:HGNC:259]	protein_coding	9.94919	10.7981	12.7913	1.00577	2.58967	1.4598	0	0	0	1.45551e-62	9.6149e-61	yes
ENSOARG00020008446	ZNF358	zinc finger protein 358 [Source:HGNC Symbol;Acc:HGNC:16838]	protein_coding	24.28	26.9302	26.2808	1.28403	4.1765	3.04386	1.24946	1.16321	1.05506	5.58562e-62	3.53842e-60	yes
ENSOARG00020020395	HS6ST2	heparan sulfate 6-O-sulfotransferase 2 [Source:NCBI gene (formerly Entrezgene);Acc:101110034]	protein_coding	8.48207	7.835	7.47408	0.955165	2.24817	1.42354	0.295472	0.191494	0.170748	2.12922e-61	1.30857e-59	yes
ENSOARG00020013282	ACSF2	acyl-CoA synthetase family member 2 [Source:HGNC Symbol;Acc:HGNC:26101]	protein_coding	5.2327	5.12874	5.08113	0.549295	0.255666	0.618893	0.193108	0.225754	0.14703	3.90407e-61	2.38747e-59	yes
ENSOARG00020000159	INHBA	inhibin subunit beta A [Source:NCBI gene (formerly Entrezgene);Acc:443524]	protein_coding	381.203	381.973	379.954	3.14789	23.0882	12.9359	3.12412	2.20536	2.93889	1.11023e-59	6.4087e-58	yes
ENSOARG00020000969	TSPO	translocator protein [Source:NCBI gene (formerly Entrezgene);Acc:443123]	protein_coding	8.77345	9.1107	9.4915	1.29307	0.88086	0.434701	0	0	0	1.59751e-59	9.13616e-58	yes
ENSOARG00020006915	TMED1	transmembrane p24 trafficking protein 1 [Source:NCBI gene (formerly Entrezgene);Acc:101119305]	protein_coding	26.8982	27.0178	27.9136	6.56456	6.55419	4.56613	3.15804	2.16154	2.97695	4.55963e-59	2.56023e-57	yes
ENSOARG00020021243	ECE1	endothelin converting enzyme 1 [Source:NCBI gene (formerly Entrezgene);Acc:443125]	protein_coding	7.7858	6.13063	7.1787	1.51693	1.57643	1.9808	0.29977	0.535853	0.599527	1.78207e-57	9.61304e-56	yes
ENSOARG00020018123	LTBP3	latent transforming growth factor beta binding protein 3 [Source:NCBI gene (formerly Entrezgene);Acc:101122993]	protein_coding	3.0616	3.21624	2.91556	0.186145	0.40377	0.173298	0.085411	0.018319	0.018949	2.83357e-57	1.50228e-55	yes
ENSOARG00020010135	RBP1	retinol binding protein 1 [Source:NCBI gene (formerly Entrezgene);Acc:101108977]	protein_coding	23.9818	21.0851	23.3176	2.7139	4.01733	3.38854	2.60386	1.59612	2.36394	9.69439e-57	4.94854e-55	yes
ENSOARG00020001975	PTN	pleiotrophin [Source:NCBI gene (formerly Entrezgene);Acc:101103149]	protein_coding	35.1016	36.4562	33.7685	2.74892	9.48253	5.20119	0.635987	0.750138	0.868013	4.85343e-56	2.41752e-54	yes
ENSOARG00020011157	EHMT2	euchromatic histone lysine methyltransferase 2 [Source:NCBI gene (formerly Entrezgene);Acc:101115739]	protein_coding	6.60748	6.95558	7.10178	0.725345	1.20584	0.712539	0.701921	1.17551	0.772068	6.14195e-56	3.04705e-54	yes
ENSOARG00020001363	DDR2	discoidin domain receptor tyrosine kinase 2 [Source:NCBI gene (formerly Entrezgene);Acc:101109754]	protein_coding	13.0884	13.1149	14.256	3.57813	2.6097	2.77372	3.50487	3.25929	2.87091	1.14683e-55	5.66672e-54	yes
ENSOARG00020008378	GPX7	glutathione peroxidase 7 [Source:HGNC Symbol;Acc:HGNC:4559]	protein_coding	11.9334	10.2189	12.1918	0.83751	1.55538	1.5645	0.225451	0.466794	0.128957	1.85656e-55	8.99374e-54	yes
ENSOARG00020018512	ACADVL	acyl-CoA dehydrogenase very long chain [Source:NCBI gene (formerly Entrezgene);Acc:101117173]	protein_coding	9.89457	8.84398	7.32766	1.17014	0.885263	1.21005	1.84409	1.84116	2.00312	9.15792e-55	4.3344e-53	yes
ENSOARG00020021631	FLNA	filamin A [Source:NCBI gene (formerly Entrezgene);Acc:101120390]	protein_coding	0.705744	0.896863	0.832755	0.078308	0.022567	0.029526	0	0	0	1.27165e-54	5.95027e-53	yes
ENSOARG00020020566	ALDH2	aldehyde dehydrogenase 2 family member [Source:NCBI gene (formerly Entrezgene);Acc:101116511]	protein_coding	15.9623	18.7856	19.0344	2.5615	3.56202	4.3937	2.6658	2.9656	3.17524	2.30496e-54	1.07042e-52	yes
ENSOARG00020013895	ATG2A	autophagy related 2A [Source:NCBI gene (formerly Entrezgene);Acc:101119171]	protein_coding	1.78353	1.4604	1.52576	0.072571	0.195542	0.092904	0	0.032696	0.020146	3.9506e-54	1.79418e-52	yes
ENSOARG00020000309	SMDT1	single-pass membrane protein with aspartate rich tail 1 [Source:NCBI gene (formerly Entrezgene);Acc:101105406]	protein_coding	59.5127	61.5885	67.3674	11.2314	16.2492	13.2805	8.49886	11.5775	13.7925	8.68453e-54	3.90109e-52	yes
ENSOARG00020011513	SMPD1	sphingomyelin phosphodiesterase 1 [Source:HGNC Symbol;Acc:HGNC:11120]	protein_coding	3.7578	3.35505	4.10199	0.205478	0.367421	0.165696	0.225576	0.238247	0.245916	2.57702e-53	1.141e-51	yes
ENSOARG00020003497	COL4A1	collagen type IV alpha 1 chain [Source:NCBI gene (formerly Entrezgene);Acc:101115552]	protein_coding	1.99712	2.45908	2.05961	0.0577522	0.173693	0.0630273	0.0795713	0.0464534	0.113927	7.54267e-53	3.2465e-51	yes
ENSOARG00020019590	KDM5B	lysine demethylase 5B [Source:NCBI gene (formerly Entrezgene);Acc:101110351]	protein_coding	3.88916	4.42533	3.78566	0.706005	0.841788	0.876913	0.66951	0.70952	0.492086	9.9215e-53	4.2117e-51	yes
ENSOARG00020022406	ARPC1B	actin related protein 2/3 complex subunit 1B [Source:NCBI gene (formerly Entrezgene);Acc:101113558]	protein_coding	13.6824	16.2378	15.6099	3.08662	1.97169	2.71538	1.45638	2.4678	1.86541	3.95114e-50	1.5397e-48	yes
ENSOARG00020004421	LCAT	Ovis aries lecithin-cholesterol acyltransferase (LCAT), mRNA. [Source:RefSeq mRNA;Acc:NM_001162568]	protein_coding	3.35065	4.6808	4.99189	0.856315	0.33935	0.645573	0	0	0	9.73946e-49	3.59139e-47	yes
ENSOARG00020012152	SLC39A7	solute carrier family 39 member 7 [Source:NCBI gene (formerly Entrezgene);Acc:100302555]	protein_coding	8.75022	8.06245	8.70716	1.09012	0.989832	0.931924	1.12104	1.84434	1.15455	1.71388e-48	6.24532e-47	yes
ENSOARG00020000276	NAGA	alpha-N-acetylgalactosaminidase [Source:NCBI gene (formerly Entrezgene);Acc:100145858]	protein_coding	7.62684	7.57409	7.05754	1.18197	1.66278	1.33562	0.318121	0.574016	0.674185	1.24835e-47	4.40595e-46	yes
ENSOARG00020025129	TAP2	transporter 2, ATP binding cassette subfamily B member [Source:NCBI gene (formerly Entrezgene);Acc:101109491]	protein_coding	4.2301	4.86192	3.90716	0.08762	0.363263	0.222123	0.486063	0.365039	0.404784	2.52038e-47	8.69673e-46	yes
ENSOARG00020011490	TMEM176B	transmembrane protein 176B [Source:NCBI gene (formerly Entrezgene);Acc:101102387]	protein_coding	15.1156	16.5002	17.5326	0.366457	2.0235	0.379108	0	0	0	2.54669e-47	8.76304e-46	yes
ENSOARG00020025918	CACHD1	cache domain containing 1 [Source:NCBI gene (formerly Entrezgene);Acc:101110191]	protein_coding	3.12811	3.04886	3.5846	0.532086	0.474599	0.52444	0.66042	0.577621	0.72453	2.5581e-47	8.77783e-46	yes
ENSOARG00020020022	ERP29	endoplasmic reticulum protein 29 [Source:HGNC Symbol;Acc:HGNC:13799]	protein_coding	21.4662	22.7218	20.5905	5.10272	4.93642	3.36434	3.58644	3.15883	2.23448	1.37121e-46	4.5904e-45	yes
ENSOARG00020005114	SERPINH1	Ovis aries serpin family H member 1 (SERPINH1), mRNA. [Source:RefSeq mRNA;Acc:NM_001308593]	protein_coding	6.76273	6.91054	7.31895	0.264747	0.395792	1.06887	0.076342	0	0.08027	1.19339e-45	3.83905e-44	yes
ENSOARG00020020541	IGFBP7	insulin like growth factor binding protein 7 [Source:HGNC Symbol;Acc:HGNC:5476]	protein_coding	60.9116	54.6416	55.459	5.93192	15.1007	12.2343	6.7727	7.38155	5.3326	5.09513e-44	1.53139e-42	yes
ENSOARG00020022415	HCFC1	host cell factor C1 [Source:HGNC Symbol;Acc:HGNC:4839]	protein_coding	6.4017	7.20795	7.10165	1.58604	0.864214	1.45501	1.22104	1.57867	1.73833	9.03019e-44	2.68795e-42	yes
ENSOARG00020022725	MDK	midkine [Source:NCBI gene (formerly Entrezgene);Acc:101114137]	protein_coding	12.2016	9.83892	12.8577	2.73635	2.90715	2.72628	0.757442	1.09667	1.02954	1.3664e-43	4.03807e-42	yes
ENSOARG00020009236	GRB14	growth factor receptor bound protein 14 [Source:NCBI gene (formerly Entrezgene);Acc:101105217]	protein_coding	10.3372	13.0788	12.3498	1.90926	3.02422	1.78433	0.429969	0.650206	1.14381	3.52206e-43	1.01417e-41	yes
ENSOARG00020018340	MCM2	minichromosome maintenance complex component 2 [Source:NCBI gene (formerly Entrezgene);Acc:101116097]	protein_coding	10.9426	9.51349	9.17574	2.21772	1.32131	1.87676	1.57265	2.27136	2.35681	6.0634e-42	1.65711e-40	yes
ENSOARG00020001311	IL27RA	interleukin 27 receptor subunit alpha [Source:NCBI gene (formerly Entrezgene);Acc:101102232]	protein_coding	2.05824	2.42294	1.55174	0.195185	0.15956	0.369401	0	0	0	8.09184e-42	2.20659e-40	yes
ENSOARG00020001172	KCNAB1	potassium voltage-gated channel subfamily A member regulatory beta subunit 1 [Source:NCBI gene (formerly Entrezgene);Acc:101110988]	protein_coding	6.68057	5.39418	6.27864	0.829921	1.73943	1.44403	0.408689	0.177546	0.179093	8.93735e-42	2.43178e-40	yes
ENSOARG00020009705	PC	pyruvate carboxylase [Source:NCBI gene (formerly Entrezgene);Acc:101107484]	protein_coding	4.18775	3.35868	3.74456	0.149303	0.515308	0.21549	0.192808	0.25648	0.294143	5.20258e-41	1.353e-39	yes
ENSOARG00020001726	MOGS	mannosyl-oligosaccharide glucosidase [Source:NCBI gene (formerly Entrezgene);Acc:101118003]	protein_coding	6.00048	6.36772	5.6356	0.564103	0.484553	1.09192	0.664257	0.776706	0.920756	7.27661e-41	1.8649e-39	yes
ENSOARG00020018970	DELE1	DAP3 binding cell death enhancer 1 [Source:NCBI gene (formerly Entrezgene);Acc:101108385]	protein_coding	2.0266	2.63348	2.20472	0.094296	0.158996	0.051735	0	0	0	1.71544e-40	4.26376e-39	yes
ENSOARG00020004268	ICAM3	intercellular adhesion molecule 3 [Source:NCBI gene (formerly Entrezgene);Acc:101113326]	protein_coding	5.0159	6.28878	4.71085	0.592688	0.516445	0.834133	0.804168	0.734827	0.691641	2.55199e-40	6.31758e-39	yes
ENSOARG00020023183	ITGBL1	integrin subunit beta like 1 [Source:HGNC Symbol;Acc:HGNC:6164]	protein_coding	5.59681	4.4407	4.5606	1.38671	0.730644	0.798023	0	0.175266	0.0947306	9.33413e-39	2.1838e-37	yes
ENSOARG00020000127	PTGR1	prostaglandin reductase 1 [Source:NCBI gene (formerly Entrezgene);Acc:101112113]	protein_coding	52.839	50.4838	54.9631	3.8751	16.8895	10.7421	1.18346	0.521989	0.299938	1.50687e-37	3.32994e-36	yes
ENSOARG00020009363	RCN3	reticulocalbin 3 [Source:NCBI gene (formerly Entrezgene);Acc:101106617]	protein_coding	9.29585	10.3821	10.184	3.12369	1.32865	2.16008	0.251862	0.431442	0.632822	1.6199e-37	3.56696e-36	yes
ENSOARG00020013829	METTL17	methyltransferase like 17 [Source:NCBI gene (formerly Entrezgene);Acc:101111807]	protein_coding	2.01674	2.16672	1.81162	0.241148	0.245721	0.319527	0	0	0	1.79858e-37	3.93934e-36	yes
ENSOARG00020000472	PDLIM4	PDZ and LIM domain 4 [Source:NCBI gene (formerly Entrezgene);Acc:101102144]	protein_coding	4.83455	4.5647	3.13063	1.06221	1.01284	0.8796	0.067737	0	0.121666	4.22461e-37	9.18778e-36	yes
ENSOARG00020007935	GATA4	GATA binding protein 4 [Source:NCBI gene (formerly Entrezgene);Acc:100820749]	protein_coding	4.12092	3.13879	3.11828	0.176274	0.312722	0.555403	0.102986	0.060346	0	6.24083e-37	1.34778e-35	yes
ENSOARG00020004940	P3H4	prolyl 3-hydroxylase family member 4 (inactive) [Source:NCBI gene (formerly Entrezgene);Acc:101108671]	protein_coding	6.66538	5.96928	8.95354	0.405441	0.780514	0.718401	0.735664	0.939817	1.44451	6.27893e-37	1.35364e-35	yes
ENSOARG00020022849	MYH11	myosin heavy chain 11 [Source:NCBI gene (formerly Entrezgene);Acc:101114409]	protein_coding	1.03462	0.919218	0.810792	0.127442	0.155317	0.118615	0.0392551	0.0852628	0.0561181	8.31543e-37	1.78644e-35	yes
ENSOARG00020019804	DDIT4	DNA damage inducible transcript 4 [Source:NCBI gene (formerly Entrezgene);Acc:101114584]	protein_coding	12.0412	10.6635	16.5881	3.41821	2.26428	3.86285	0.890407	1.36065	1.02684	1.93025e-36	4.08294e-35	yes
ENSOARG00020008287	PFKP	phosphofructokinase, platelet [Source:NCBI gene (formerly Entrezgene);Acc:101108592]	protein_coding	2.8963	2.56231	2.72892	0.218048	0.437496	0.538803	0.144198	0.198773	0.188536	4.24981e-36	8.77892e-35	yes
ENSOARG00020022289	SEC24C	SEC24 homolog C, COPII coat complex component [Source:NCBI gene (formerly Entrezgene);Acc:101119874]	protein_coding	2.85679	1.98978	2.53383	0.451497	0.474685	0.513454	0.135857	0.294554	0.222287	2.53265e-35	5.04609e-34	yes
ENSOARG00020018326	SLC35C2	solute carrier family 35 member C2 [Source:NCBI gene (formerly Entrezgene);Acc:101117780]	protein_coding	2.72702	3.55671	3.56198	0.275783	0.306814	0.179505	0.333825	0.274764	0.223159	1.72849e-34	3.27485e-33	yes
ENSOARG00020023431	P3H3	prolyl 3-hydroxylase 3 [Source:NCBI gene (formerly Entrezgene);Acc:101108826]	protein_coding	11.11	10.7314	11.2405	0.174466	1.11992	0.6115	0.257037	0.189024	0.040943	1.84202e-34	3.47928e-33	yes
ENSOARG00020026042	SLC16A3	solute carrier family 16 member 3 [Source:NCBI gene (formerly Entrezgene);Acc:101111643]	protein_coding	2.12955	2.09361	1.41209	0	0.041769	0	0	0	0	4.80975e-34	8.88114e-33	yes
ENSOARG00020022857	VEGFA	vascular endothelial growth factor A [Source:HGNC Symbol;Acc:HGNC:12680]	protein_coding	6.20172	8.45048	5.73716	0.580319	2.01436	1.05905	0.135459	0.288756	0.168068	7.28283e-34	1.32301e-32	yes
ENSOARG00020021119	PLPP3	phospholipid phosphatase 3 [Source:NCBI gene (formerly Entrezgene);Acc:101102020]	protein_coding	12.0245	13.6512	13.6979	0.173094	0.81587	0.371266	0.355449	0	0.220122	9.89175e-34	1.78124e-32	yes
ENSOARG00020005834	LRP8	LDL receptor related protein 8 [Source:NCBI gene (formerly Entrezgene);Acc:101116697]	protein_coding	4.8968	5.28633	4.66319	0.112581	0.71647	0.370062	0.156081	0.064588	0.171389	2.94247e-33	5.1485e-32	yes
ENSOARG00020009787	IHH	Indian hedgehog signaling molecule [Source:NCBI gene (formerly Entrezgene);Acc:101113658]	protein_coding	4.16105	3.40241	4.65413	0.128831	0.794957	0.342855	0	0	0	3.16098e-33	5.51519e-32	yes
ENSOARG00020018086	CNPY3	canopy FGF signaling regulator 3 [Source:HGNC Symbol;Acc:HGNC:11968]	protein_coding	4.42372	3.45126	3.43706	0.383479	0.518553	0.322142	0	0	0	4.95918e-33	8.59197e-32	yes
ENSOARG00020000412	HNRNPLL	heterogeneous nuclear ribonucleoprotein L like [Source:HGNC Symbol;Acc:HGNC:25127]	protein_coding	1.37469	1.60384	1.68983	0.223159	0.411714	0.288886	0	0	0	6.36548e-33	1.09822e-31	yes
ENSOARG00020022906	RNF208	ring finger protein 208 [Source:NCBI gene (formerly Entrezgene);Acc:106991014]	protein_coding	4.39464	3.76271	6.41887	0.755162	0.600329	0.238309	0	0	0	5.97633e-32	9.77822e-31	yes
ENSOARG00020020779	PURA	Ovis aries purine rich element binding protein A (PURA), mRNA. [Source:RefSeq mRNA;Acc:NM_001009447]	protein_coding	13.6488	14.8679	13.3551	0.813308	2.24738	1.80912	3.17491	2.29616	2.36175	1.28117e-31	2.0661e-30	yes
ENSOARG00020025311	PCYT2	phosphate cytidylyltransferase 2, ethanolamine [Source:NCBI gene (formerly Entrezgene);Acc:101113687]	protein_coding	5.80147	4.60612	5.89147	0.691108	0.278746	0.58283	0.244753	0.672693	0.430805	2.16785e-31	3.45988e-30	yes
ENSOARG00020003468	CSRP2	cysteine and glycine rich protein 2 [Source:NCBI gene (formerly Entrezgene);Acc:101123618]	protein_coding	14.194	13.7132	12.8343	1.41372	4.31822	2.85781	1.0559	0.652363	0.46334	3.52064e-31	5.56856e-30	yes
ENSOARG00020012041	SAT2	spermidine/spermine N1-acetyltransferase family member 2 [Source:NCBI gene (formerly Entrezgene);Acc:101103248]	protein_coding	10.7259	8.28101	9.11319	0.619832	4.12777	1.35325	0	0	0	3.66801e-31	5.77946e-30	yes
ENSOARG00020012980	UTRN	utrophin [Source:HGNC Symbol;Acc:HGNC:12635]	protein_coding	1.61519	1.22838	1.2585	0.200881	0.393896	0.286114	0.216154	0.251976	0.191128	5.03845e-31	7.90851e-30	yes
ENSOARG00020006709	U6	U6 spliceosomal RNA [Source:RFAM;Acc:RF00026]	snRNA	7.2662	13.7439	9.02213	47.603	34.6651	48.6294	95.6433	107.532	86.8575	6.365e-31	9.94018e-30	yes
ENSOARG00020011053	PRKAR2B	protein kinase cAMP-dependent type II regulatory subunit beta [Source:NCBI gene (formerly Entrezgene);Acc:101106003]	protein_coding	31.3402	31.8242	36.5023	4.7396	10.2694	5.15414	8.14142	7.02301	7.69816	1.06629e-30	1.63829e-29	yes
ENSOARG00020005346	BCAM	basal cell adhesion molecule (Lutheran blood group) [Source:NCBI gene (formerly Entrezgene);Acc:101111740]	protein_coding	4.21139	4.26727	3.14277	0.760759	0.414583	0.729152	0.163434	0.203664	0.431629	1.17472e-30	1.80265e-29	yes
ENSOARG00020008616	ADAMTSL4	ADAMTS like 4 [Source:NCBI gene (formerly Entrezgene);Acc:101106381]	protein_coding	1.59118	1.67778	1.26717	0.298833	0.357027	0.272064	0.113709	0.119704	0.131784	2.40885e-30	3.62443e-29	yes
ENSOARG00020006223	F10	coagulation factor X [Source:NCBI gene (formerly Entrezgene);Acc:101118624]	protein_coding	2.07107	2.66249	2.62763	0	0.152784	0.09634	0	0	0	3.41017e-30	5.08767e-29	yes
ENSOARG00020024306	CRELD1	cysteine rich with EGF like domains 1 [Source:NCBI gene (formerly Entrezgene);Acc:101102184]	protein_coding	11.9181	9.92087	11.5731	1.5081	3.61113	2.3753	1.54157	1.49864	1.63714	4.60954e-30	6.79494e-29	yes
ENSOARG00020023038	JUN	Jun proto-oncogene, AP-1 transcription factor subunit [Source:NCBI gene (formerly Entrezgene);Acc:443219]	protein_coding	15.1081	16.8907	16.1713	0.50685	2.1316	1.39978	1.83978	0.859258	1.69337	4.71805e-30	6.93834e-29	yes
ENSOARG00020022045	ESR1	estrogen receptor 1 [Source:NCBI gene (formerly Entrezgene);Acc:443228]	protein_coding	0.490709	0.582118	0.65343	0.15391	0.0903162	0.0825259	0	0.0107	0	6.27965e-30	9.14771e-29	yes
ENSOARG00020007944	KLF6	Kruppel like factor 6 [Source:HGNC Symbol;Acc:HGNC:2235]	protein_coding	19.1341	24.5448	22.7057	3.40143	6.31142	6.60997	4.74475	4.50122	5.69482	6.5696e-30	9.55881e-29	yes
ENSOARG00020013965	CAPN2	calpain 2 [Source:NCBI gene (formerly Entrezgene);Acc:100127211]	protein_coding	2.49281	2.21631	2.712	0.385777	0.446157	0.31013	0.482915	0.516872	0.43399	7.83946e-30	1.13e-28	yes
ENSOARG00020024084	CYP11A1	Ovis aries cytochrome P450, family 11, subfamily A, polypeptide 1 (CYP11A1), mRNA. [Source:RefSeq mRNA;Acc:NM_001093789]	protein_coding	100.848	96.0188	93.1087	0.518404	9.35404	6.57566	0.682547	0.661492	1.17889	1.55218e-29	2.21922e-28	yes
ENSOARG00020008222	SLC24A5	Ovis aries solute carrier family 24 member 5 (SLC24A5), mRNA. [Source:RefSeq mRNA;Acc:NM_001252181]	protein_coding	3.10293	2.33857	2.95837	0.532803	0.451152	0.388179	0	0.132008	0.080581	5.58212e-29	7.76606e-28	yes
ENSOARG00020004870	JUND	JunD proto-oncogene, AP-1 transcription factor subunit [Source:HGNC Symbol;Acc:HGNC:6206]	protein_coding	5.33192	4.24613	3.91138	0.386168	0.462344	0.619982	0.12779	0.055031	0.388213	6.16041e-29	8.5505e-28	yes
ENSOARG00020008020	TUT4	terminal uridylyl transferase 4 [Source:NCBI gene (formerly Entrezgene);Acc:101115584]	protein_coding	2.72871	2.4136	2.60173	0.299287	0.7662	0.714824	0.327957	0.2808	0.282561	1.1057e-28	1.51944e-27	yes
ENSOARG00020009245	FCGRT	Ovis aries Fc fragment of IgG receptor and transporter (FCGRT), mRNA. [Source:RefSeq mRNA;Acc:NM_001123403]	protein_coding	6.95411	7.58167	7.57395	1.61357	0.926485	2.17666	1.0032	0.60779	0.897752	1.10579e-28	1.51944e-27	yes
ENSOARG00020000547	ROR2	receptor tyrosine kinase like orphan receptor 2 [Source:NCBI gene (formerly Entrezgene);Acc:101109779]	protein_coding	1.26025	0.76094	1.05584	0.077044	0.06697	0.128712	0	0	0	1.17593e-28	1.61046e-27	yes
ENSOARG00020015033	TRIP6	thyroid hormone receptor interactor 6 [Source:NCBI gene (formerly Entrezgene);Acc:101120629]	protein_coding	4.60415	5.65575	5.61773	0.317512	0.509299	0.258452	0	0.265215	0.292102	1.66672e-28	2.25782e-27	yes
ENSOARG00020019221	LRP10	LDL receptor related protein 10 [Source:NCBI gene (formerly Entrezgene);Acc:101104404]	protein_coding	2.14719	2.52673	2.38056	0.690988	0.464366	0.533276	0.221133	0.333919	0.282934	1.66691e-28	2.25782e-27	yes
ENSOARG00020000368	P3H1	prolyl 3-hydroxylase 1 [Source:NCBI gene (formerly Entrezgene);Acc:101105862]	protein_coding	5.69906	5.6369	4.64353	0.90709	0.371951	0.792412	1.34226	0.939444	1.19738	8.42496e-28	1.08523e-26	yes
ENSOARG00020016209	SMARCD3	SWI/SNF related, matrix associated, actin dependent regulator of chromatin, subfamily d, member 3 [Source:HGNC Symbol;Acc:HGNC:11108]	protein_coding	4.94385	3.9859	3.15291	0.372515	0.161728	0.483051	0.144965	0.0989959	0.378139	9.63148e-28	1.23677e-26	yes
ENSOARG00020010066	SPRN	Ovis aries shadow of prion protein (SPRN), mRNA. [Source:RefSeq mRNA;Acc:NM_001162561]	protein_coding	2.4471	1.58942	1.90806	0.075502	0.166223	0.108807	0.075927	0.256788	0.198482	1.03883e-27	1.33119e-26	yes
ENSOARG00020011244	GREB1	growth regulating estrogen receptor binding 1 [Source:HGNC Symbol;Acc:HGNC:24885]	protein_coding	1.15274	1.54855	1.08989	0.296153	0.297592	0.262994	0.0643014	0.0625468	0	1.1162e-27	1.42738e-26	yes
ENSOARG00020021159	MKX	mohawk homeobox [Source:NCBI gene (formerly Entrezgene);Acc:101120262]	protein_coding	8.5534	8.42321	7.0271	0.297251	0.604772	1.6208	0.260954	0.334901	0.128512	3.79322e-27	4.7188e-26	yes
ENSOARG00020013418	MAP7D1	MAP7 domain containing 1 [Source:NCBI gene (formerly Entrezgene);Acc:101112772]	protein_coding	1.45756	1.57851	1.12515	0.14317	0.092509	0.134904	0	0.046783	0.060061	4.67909e-27	5.75706e-26	yes
ENSOARG00020021251	MARCKSL1	MARCKS like 1 [Source:NCBI gene (formerly Entrezgene);Acc:101105729]	protein_coding	6.12371	4.79207	5.17079	1.66667	1.00196	1.2271	0.320258	0.469394	0.389028	6.26545e-27	7.64039e-26	yes
ENSOARG00020010678	SCD5	Ovis aries stearoyl-CoA desaturase 5 (SCD5), mRNA. [Source:RefSeq mRNA;Acc:NM_001112815]	protein_coding	3.06284	2.52318	3.41858	0.165977	0.394938	0.510565	0.144553	0.062252	0	1.42236e-26	1.67817e-25	yes
ENSOARG00020017146	LRP12	LDL receptor related protein 12 [Source:NCBI gene (formerly Entrezgene);Acc:101123640]	protein_coding	0.776034	1.24377	1.47254	0.143556	0.322251	0.221038	0	0	0	1.54818e-26	1.81967e-25	yes
ENSOARG00020011210	ABCB6	ATP binding cassette subfamily B member 6 (Langereis blood group) [Source:NCBI gene (formerly Entrezgene);Acc:101115097]	protein_coding	11.3451	12.6342	11.2896	0.133668	1.36715	0.660165	0.048915	0.219208	0.026133	1.99229e-26	2.32177e-25	yes
ENSOARG00020025920	GATA6	GATA binding protein 6 [Source:NCBI gene (formerly Entrezgene);Acc:100820751]	protein_coding	1.30923	1.2537	1.60282	0.0251419	0.0588931	0.201871	0	0	0	2.61021e-26	3.01909e-25	yes
ENSOARG00020008560	PNPLA6	patatin like phospholipase domain containing 6 [Source:NCBI gene (formerly Entrezgene);Acc:101123119]	protein_coding	1.67593	1.84667	2.16496	0.341758	0.401192	0.403386	0.274377	0.362079	0.471848	6.87533e-26	7.74211e-25	yes
ENSOARG00020012417	BHLHE40	basic helix-loop-helix family member e40 [Source:NCBI gene (formerly Entrezgene);Acc:100169939]	protein_coding	13.6101	12.9612	12.0914	0.844042	3.21084	1.8711	0.1145	0.474001	0.74533	1.21385e-25	1.34e-24	yes
ENSOARG00020016108	CHPF	chondroitin polymerizing factor [Source:NCBI gene (formerly Entrezgene);Acc:101114088]	protein_coding	1.92753	1.56207	2.07646	0.421866	0.307352	0.485141	0.176217	0.098806	0.170007	2.83424e-25	3.07657e-24	yes
ENSOARG00020013867	AK7	adenylate kinase 7 [Source:NCBI gene (formerly Entrezgene);Acc:101121552]	protein_coding	1.19522	1.18695	1.32529	0.325283	0.227217	0.296853	0	0	0.0337055	9.55117e-25	1.00584e-23	yes
ENSOARG00020008724	MAP1A	microtubule associated protein 1A [Source:NCBI gene (formerly Entrezgene);Acc:101110454]	protein_coding	0.861437	0.879503	1.39678	0.147057	0.260502	0.175403	0.184679	0.182957	0.116582	2.71568e-24	2.79092e-23	yes
ENSOARG00020010945	TRPS1	transcriptional repressor GATA binding 1 [Source:NCBI gene (formerly Entrezgene);Acc:101116062]	protein_coding	0.936318	1.07588	1.11666	0.176697	0.205414	0.101725	0.162957	0.130085	0.108026	5.50957e-24	5.55137e-23	yes
ENSOARG00020021365	RAB34	RAB34, member RAS oncogene family [Source:HGNC Symbol;Acc:HGNC:16519]	protein_coding	3.916	3.592	3.43987	0.267622	0.613961	0.297915	0.394974	0.0904109	0.159099	6.88667e-24	6.90511e-23	yes
ENSOARG00020017486	ARMCX2	armadillo repeat containing X-linked 2 [Source:NCBI gene (formerly Entrezgene);Acc:101108027]	protein_coding	1.37583	1.30378	1.66954	0.015309	0.111269	0.092677	0	0	0	7.11782e-24	7.1311e-23	yes
ENSOARG00020000874	S100A2	S100 calcium binding protein A2 [Source:NCBI gene (formerly Entrezgene);Acc:101105293]	protein_coding	13.8067	18.761	17.0014	2.09352	5.40498	3.87878	2.00371	1.16223	2.31757	1.25225e-23	1.23358e-22	yes
ENSOARG00020024444	SLC35B2	solute carrier family 35 member B2 [Source:NCBI gene (formerly Entrezgene);Acc:101118058]	protein_coding	3.24786	3.2963	4.54585	1.03293	0.834729	0.559079	0.39068	0.135693	0.194041	2.38978e-23	2.30812e-22	yes
ENSOARG00020009371	AFF2	AF4/FMR2 family member 2 [Source:HGNC Symbol;Acc:HGNC:3776]	protein_coding	1.29075	1.28938	1.45209	0.173204	0.296633	0.247571	0.105337	0.0938432	0.246263	3.50908e-23	3.34731e-22	yes
ENSOARG00020010879	TPGS1	tubulin polyglutamylase complex subunit 1 [Source:HGNC Symbol;Acc:HGNC:25058]	protein_coding	6.63086	8.35875	8.2004	1.72837	2.06712	1.32778	0.450987	1.26177	0.916535	5.32438e-23	5.05939e-22	yes
ENSOARG00020012987	SDC4	syndecan 4 [Source:NCBI gene (formerly Entrezgene);Acc:101108677]	protein_coding	6.00986	5.80049	4.74526	0.300566	1.40287	0.800157	0.066644	0.269921	0.09822	9.43686e-23	8.83133e-22	yes
ENSOARG00020001213	CALD1	caldesmon 1 [Source:HGNC Symbol;Acc:HGNC:1441]	protein_coding	2.66592	2.29793	3.23742	0.343009	0.722003	0.533892	0.354854	0.45307	0.190741	1.27033e-22	1.17546e-21	yes
ENSOARG00020008639	CYP27A1	cytochrome P450 family 27 subfamily A member 1 [Source:HGNC Symbol;Acc:HGNC:2605]	protein_coding	1.12592	1.83464	1.49042	0.402104	0.196873	0.319186	0	0	0	2.18068e-22	2.00133e-21	yes
ENSOARG00020003633	SMOX	spermine oxidase [Source:NCBI gene (formerly Entrezgene);Acc:101118975]	protein_coding	1.77613	1.80062	1.81702	0.0834912	0.668215	0.49893	0	0	0	2.43064e-22	2.2192e-21	yes
ENSOARG00020011227	PIMREG	PICALM interacting mitotic regulator [Source:NCBI gene (formerly Entrezgene);Acc:101104673]	protein_coding	1.96904	2.16183	2.05889	0.185327	0.299226	0.055298	0	0	0	2.98503e-22	2.70338e-21	yes
ENSOARG00020001515	REG4	regenerating family member 4 [Source:NCBI gene (formerly Entrezgene);Acc:101111843]	protein_coding	1.88162	2.07294	2.49021	0	0	0	0	0	0	5.09482e-22	4.57053e-21	yes
ENSOARG00020016019	TM7SF2	transmembrane 7 superfamily member 2 [Source:NCBI gene (formerly Entrezgene);Acc:100037702]	protein_coding	6.35307	4.64686	6.39774	1.2324	1.79003	1.20214	1.29122	1.56745	1.42251	5.38394e-22	4.8194e-21	yes
ENSOARG00020005706	NCAPD2	non-SMC condensin I complex subunit D2 [Source:NCBI gene (formerly Entrezgene);Acc:101113225]	protein_coding	2.19715	2.03474	1.75557	0.48393	0.198093	0.418315	0.355341	0.460734	0.397772	6.82201e-22	6.04536e-21	yes
ENSOARG00020003581	RBCK1	RANBP2-type and C3HC4-type zinc finger containing 1 [Source:NCBI gene (formerly Entrezgene);Acc:101122207]	protein_coding	1.7679	1.37135	1.0419	0	0	0	0.0490682	0	0	3.61066e-21	3.06126e-20	yes
ENSOARG00020016425	SLC4A3	solute carrier family 4 member 3 [Source:HGNC Symbol;Acc:HGNC:11029]	protein_coding	1.14735	0.870472	0.692693	0.0952676	0.187088	0.249759	0.00630325	0.0237475	0.0552207	6.28459e-21	5.25973e-20	yes
ENSOARG00020012727	OSGEP	O-sialoglycoprotein endopeptidase [Source:NCBI gene (formerly Entrezgene);Acc:101115213]	protein_coding	5.64573	6.43712	5.33385	0.737961	1.20065	1.43209	0.933668	0.752902	1.44773	9.1939e-21	7.6219e-20	yes
ENSOARG00020011512	MADD	MAP kinase activating death domain [Source:NCBI gene (formerly Entrezgene);Acc:101117276]	protein_coding	1.0792	1.24562	1.55183	0.307135	0.175517	0.21228	0.248097	0.303923	0.367945	1.11228e-20	9.15385e-20	yes
ENSOARG00020003457	GFOD2	glucose-fructose oxidoreductase domain containing 2 [Source:NCBI gene (formerly Entrezgene);Acc:101115644]	protein_coding	4.0335	4.14342	3.55286	1.02071	0.627167	0.838665	0.235036	0.594703	0.42833	2.33784e-20	1.88507e-19	yes
ENSOARG00020004475	ISYNA1	inositol-3-phosphate synthase 1 [Source:NCBI gene (formerly Entrezgene);Acc:101109704]	protein_coding	8.33302	9.33619	7.14705	2.58338	1.46251	1.55963	1.05788	2.02103	2.16287	4.00722e-20	3.17927e-19	yes
ENSOARG00020002171	CCDC184	coiled-coil domain containing 184 [Source:NCBI gene (formerly Entrezgene);Acc:101107853]	protein_coding	17.111	15.3297	12.3493	2.74151	3.13633	2.828	1.32088	3.99659	2.48696	4.28204e-20	3.38643e-19	yes
ENSOARG00020024989	DPP7	dipeptidyl peptidase 7 [Source:NCBI gene (formerly Entrezgene);Acc:105605898]	protein_coding	2.07005	1.89837	1.78183	0.322254	0.19872	0.422627	0	0.100943	0.071707	4.79447e-20	3.77476e-19	yes
ENSOARG00020007231	POFUT2	protein O-fucosyltransferase 2 [Source:NCBI gene (formerly Entrezgene);Acc:101105718]	protein_coding	2.39401	1.90272	1.87421	0.375472	0.493079	0.316898	0.087548	0.175938	0.096733	9.16869e-20	7.08766e-19	yes
ENSOARG00020017045	LRRC3B	leucine rich repeat containing 3B [Source:NCBI gene (formerly Entrezgene);Acc:101121397]	protein_coding	5.03797	4.1436	4.71122	0.892882	1.35941	0.449663	0.172147	0	0.173779	1.12167e-19	8.63841e-19	yes
ENSOARG00020012314	RUSC1	RUN and SH3 domain containing 1 [Source:NCBI gene (formerly Entrezgene);Acc:101119520]	protein_coding	0.90802	1.07402	1.10564	0.0881017	0.0352853	0.178565	0.0294223	0	0	2.39668e-19	1.80196e-18	yes
ENSOARG00020019374	EHMT1	euchromatic histone lysine methyltransferase 1 [Source:NCBI gene (formerly Entrezgene);Acc:101123545]	protein_coding	2.79668	2.13267	2.65945	0.639346	0.738879	0.418257	0.480332	0.81716	0.582661	3.86904e-19	2.86708e-18	yes
ENSOARG00020013897	HYAL1	hyaluronidase 1 [Source:NCBI gene (formerly Entrezgene);Acc:101121207]	protein_coding	3.30033	2.34756	3.69858	0.04152	0.094577	0.382212	0.106908	0.106731	0.298924	5.5416e-19	4.0723e-18	yes
ENSOARG00020016034	SMAD4	SMAD family member 4 [Source:NCBI gene (formerly Entrezgene);Acc:443171]	protein_coding	3.2632	3.73895	3.82399	0.397449	1.10559	0.775803	0	0	0.181824	7.95857e-19	5.80013e-18	yes
ENSOARG00020018854	GTF2IRD1	GTF2I repeat domain containing 1 [Source:HGNC Symbol;Acc:HGNC:4661]	protein_coding	1.13487	0.599691	0.852678	0.131398	0.243811	0.201138	0.0299617	0	0	1.18582e-18	8.51655e-18	yes
ENSOARG00020023452	PLAU	Ovis aries plasminogen activator, urokinase (PLAU), mRNA. [Source:RefSeq mRNA;Acc:NM_001163593]	protein_coding	0.744132	0.807234	0.616084	0	0	0	0	0	0	1.71781e-18	1.22095e-17	yes
ENSOARG00020018031	ADAMTS7	ADAM metallopeptidase with thrombospondin type 1 motif 7 [Source:NCBI gene (formerly Entrezgene);Acc:101114142]	protein_coding	1.1037	1.3944	1.45649	0.375701	0.196558	0.256494	0.237802	0.369509	0.322423	2.46234e-18	1.72923e-17	yes
ENSOARG00020022259	MYZAP	myocardial zonula adherens protein [Source:NCBI gene (formerly Entrezgene);Acc:101117934]	protein_coding	3.27856	3.38374	3.1916	0.455467	1.02986	0.484476	0.441083	0.52998	0.193996	3.46015e-18	2.41079e-17	yes
ENSOARG00020024738	PLOD3	procollagen-lysine,2-oxoglutarate 5-dioxygenase 3 [Source:HGNC Symbol;Acc:HGNC:9083]	protein_coding	2.12647	1.8143	1.92138	0.63732	0.392045	0.433981	0.42283	0.349131	0.469929	5.50365e-18	3.76448e-17	yes
ENSOARG00020009900	MYC	Ovis aries MYC proto-oncogene, bHLH transcription factor (MYC), mRNA. [Source:RefSeq mRNA;Acc:NM_001009426]	protein_coding	3.83092	2.84996	2.75252	0.152992	0.513139	0.436044	0.160697	0	0	1.01135e-17	6.78606e-17	yes
ENSOARG00020003555	ST3GAL5	ST3 beta-galactoside alpha-2,3-sialyltransferase 5 [Source:NCBI gene (formerly Entrezgene);Acc:101104977]	protein_coding	1.34556	2.03625	1.34104	0	0	0.074832	0	0	0	1.45891e-17	9.67359e-17	yes
ENSOARG00020007767	PLXNB2	plexin B2 [Source:NCBI gene (formerly Entrezgene);Acc:101116473]	protein_coding	0.944619	0.748514	0.763305	0.077961	0.023688	0.070397	0	0.053013	0.06638	1.89557e-17	1.24487e-16	yes
ENSOARG00020017786	HSPG2	heparan sulfate proteoglycan 2 [Source:HGNC Symbol;Acc:HGNC:5273]	protein_coding	0.234617	0.199742	0.180633	0.021715	0	0.016733	0	0	0	2.37414e-17	1.54438e-16	yes
ENSOARG00020023581	QSOX1	quiescin sulfhydryl oxidase 1 [Source:HGNC Symbol;Acc:HGNC:9756]	protein_coding	2.05238	2.06782	1.86587	0.340829	0.507331	0.46829	0.288851	0.600097	0.425038	7.53936e-17	4.71802e-16	yes
ENSOARG00020011996	CHRNA2	cholinergic receptor nicotinic alpha 2 subunit [Source:HGNC Symbol;Acc:HGNC:1956]	protein_coding	6.53215	4.08613	3.69339	0.345067	1.95246	0.751492	0	0.200952	0.107903	1.1912e-16	7.28821e-16	yes
ENSOARG00020016656	EVL	Enah/Vasp-like [Source:NCBI gene (formerly Entrezgene);Acc:101118138]	protein_coding	6.12439	3.98186	4.07792	0.51224	1.27263	0.429931	0.875212	1.16762	1.19491	1.42454e-16	8.68575e-16	yes
ENSOARG00020023775	NAGLU	N-acetyl-alpha-glucosaminidase [Source:NCBI gene (formerly Entrezgene);Acc:101102252]	protein_coding	2.81654	2.78233	2.85652	0.617547	0.632345	0.771589	0.389334	0.913348	0.476954	1.93041e-16	1.16951e-15	yes
ENSOARG00020012170	LGALS3BP	galectin 3 binding protein [Source:NCBI gene (formerly Entrezgene);Acc:101112495]	protein_coding	1.52665	1.93325	1.86776	0.131473	0.220848	0.40853	0.14574	0.179005	0.142188	2.68478e-16	1.61309e-15	yes
ENSOARG00020006642	NYNRIN	NYN domain and retroviral integrase containing [Source:HGNC Symbol;Acc:HGNC:20165]	protein_coding	0.268053	0.292998	0.335681	0	0	0	0.052316	0.05918	0.06525	3.35533e-16	2.00137e-15	yes
ENSOARG00020019011	NEXMIF	neurite extension and migration factor [Source:HGNC Symbol;Acc:HGNC:29433]	protein_coding	0.442495	0.604981	0.565971	0	0.063732	0.032563	0	0	0	4.17214e-16	2.47305e-15	yes
ENSOARG00020022377	FUT11	fucosyltransferase 11 [Source:NCBI gene (formerly Entrezgene);Acc:101108628]	protein_coding	4.68781	3.11764	3.22199	0.238982	0.581712	0.644479	0.191358	0.746635	0.393142	5.10583e-16	2.99916e-15	yes
ENSOARG00020024251	NOS2	nitric oxide synthase 2 [Source:HGNC Symbol;Acc:HGNC:7873]	protein_coding	0.74717	0.898972	0.896889	0.0645155	0.11006	0.0435305	0.0336084	0.135655	0.0798478	7.32605e-16	4.24876e-15	yes
ENSOARG00020017430	ARMCX1	armadillo repeat containing X-linked 1 [Source:NCBI gene (formerly Entrezgene);Acc:101106745]	protein_coding	2.53658	2.31374	1.37454	0.096253	0.204602	0	0.051952	0.059462	0.052168	8.49407e-16	4.89171e-15	yes
ENSOARG00020011748	KCNH2	potassium voltage-gated channel subfamily H member 2 [Source:NCBI gene (formerly Entrezgene);Acc:101106315]	protein_coding	0.505179	0.662296	0.496016	0.045983	0.0140337	0.0599708	0	0	0.0272092	9.66019e-16	5.5349e-15	yes

## Sheet: Table S5
Table S5. Summary of meiosis-related genes information in sheep oocytes based on the Human Protein Atlas database
gene_id	gene_name	EntrezID	transcript_id	GO	KEGG	KO_ENTRY	EC	Description	trans_type	FPKM.LO_1	FPKM.LO_2	FPKM.LO_3	FPKM.MO_1	FPKM.MO_2	FPKM.MO_3	FPKM.SO_1	FPKM.SO_2	FPKM.SO_3	pval	qval	significant
MI
ENSOARG00020005745	HSF2BP	5866	ENSOART00020008890	GO:0005694(chromosome)				heat shock transcription factor 2 binding protein [Source:NCBI gene (formerly Entrezgene);Acc:101106734]	protein_coding	101.597	91.5442	94.9353	67.2851	67.0907	64.9437	29.5852	28.903	32.906	2.30368e-57	1.22661e-55	yes
ENSOARG00020011260	UBB	7959	ENSOART00020017154	GO:0005515(protein binding);GO:0005739(mitochondrion);GO:0007141(male meiosis I);GO:0007144(female meiosis I);GO:0008584(male gonad development);GO:0008585(female gonad development);GO:0021888(hypothalamus gonadotrophin-releasing hormone neuron development);GO:0031398(positive regulation of protein ubiquitination);GO:0043005(neuron projection);GO:0043025(neuronal cell body);GO:0043523(regulation …	04120(Ubiquitin mediated proteolysis);04137(Mitophagy - animal);05012(Parkinson disease);05022(Pathways of neurodegeneration - multiple diseases);05167(Kaposi sarcoma-associated herpesvirus infection)			Ovis aries ubiquitin B (UBB), mRNA. [Source:RefSeq mRNA;Acc:NM_001009202]	protein_coding	29831.5	30699.2	31454.2	24314.3	29146.1	26625.8	20001.2	21326.6	21447.1	1.73279e-33	3.06664e-32	yes
ENSOARG00020009456	REC8	37778	ENSOART00020014626	GO:0000724(double-strand break repair via homologous recombination);GO:0000776(kinetochore);GO:0000779(condensed chromosome, centromeric region);GO:0000793(condensed chromosome);GO:0000794(condensed nuclear chromosome);GO:0000795(synaptonemal complex);GO:0000800(lateral element);GO:0001556(oocyte maturation);GO:0001673(male germ cell nucleus);GO:0005515(protein binding);GO:0005634(nucleus);GO:000…				REC8 meiotic recombination protein [Source:HGNC Symbol;Acc:HGNC:16879]	protein_coding	26.9164	30.6074	28.2164	66.4788	54.0574	61.7448	51.3664	53.6814	53.7903	3.2523e-27	4.06225e-26	yes
ENSOARG00020007157	ESPL1	30515	ENSOART00020010950	GO:0000070(mitotic sister chromatid segregation);GO:0000212(meiotic spindle organization);GO:0000278(mitotic cell cycle);GO:0004197(cysteine-type endopeptidase activity);GO:0005634(nucleus);GO:0005813(centrosome);GO:0006508(proteolysis);GO:0007059(chromosome segregation);GO:0007127(meiosis I);GO:0008233(peptidase activity);GO:0008234(cysteine-type peptidase activity);GO:0045143(homologous chromos…	04110(Cell cycle);04114(Oocyte meiosis);05166(Human T-cell leukemia virus 1 infection)	K02365	EC:3.4.22.49	extra spindle pole bodies like 1, separase [Source:NCBI gene (formerly Entrezgene);Acc:101105898]	protein_coding	17.5017	16.7921	16.7236	8.37686	6.91897	7.66731	11.1138	10.0663	10.014	9.32728e-27	1.11973e-25	yes
ENSOARG00020016070	RAD51C	8737	ENSOART00020024849	GO:0000166(nucleotide binding);GO:0000400(four-way junction DNA binding);GO:0000722(telomere maintenance via recombination);GO:0000724(double-strand break repair via homologous recombination);GO:0003677(DNA binding);GO:0005524(ATP binding);GO:0005634(nucleus);GO:0005654(nucleoplasm);GO:0005657(replication fork);GO:0005737(cytoplasm);GO:0005739(mitochondrion);GO:0005829(cytosol);GO:0006281(DNA rep…				RAD51 paralog C [Source:HGNC Symbol;Acc:HGNC:9820]	protein_coding	20.4514	18.8665	21.0143	18.0979	25.2163	18.5553	6.22852	8.09897	7.07502	1.28814e-21	1.12376e-20	yes
ENSOARG00020014512	SPO11	10933;10934	ENSOART00020022742;ENSOART00020022781	GO:0000781(chromosome, telomeric region);GO:0001541(ovarian follicle development);GO:0003677(DNA binding);GO:0003824(catalytic activity);GO:0003918(DNA topoisomerase type II (double strand cut, ATP-hydrolyzing) activity);GO:0005524(ATP binding);GO:0005694(chromosome);GO:0006259(DNA metabolic process);GO:0007129(homologous chromosome pairing at meiosis);GO:0007130(synaptonemal complex assembly);GO…				SPO11 initiator of meiotic double stranded breaks [Source:NCBI gene (formerly Entrezgene);Acc:101118122]	protein_coding	2.88113	3.49627	2.51877	12.2939	7.22592	11.0042	2.83151	2.17645	1.69352	3.63309e-19	2.69871e-18	yes
ENSOARG00020000222	NCAPH	30164	ENSOART00020000284	GO:0000794(condensed nuclear chromosome);GO:0000796(condensin complex);GO:0003682(chromatin binding);GO:0005634(nucleus);GO:0005654(nucleoplasm);GO:0005694(chromosome);GO:0005829(cytosol);GO:0007076(mitotic chromosome condensation);GO:0007143(female meiotic nuclear division);GO:0010032(meiotic chromosome condensation);GO:0045132(meiotic chromosome segregation);GO:0051309(female meiosis chromosome…				non-SMC condensin I complex subunit H [Source:HGNC Symbol;Acc:HGNC:1112]	protein_coding	34.6515	35.9395	32.4817	17.6336	19.4923	19.3546	28.2787	31.8105	29.4913	8.35321e-18	5.63249e-17	yes
ENSOARG00020015608	AURKA	10947;10948	ENSOART00020024001;ENSOART00020024149	GO:0000212(meiotic spindle organization);GO:0000226(microtubule cytoskeleton organization);GO:0000278(mitotic cell cycle);GO:0000922(spindle pole);GO:0004672(protein kinase activity);GO:0004674(protein serine/threonine kinase activity);GO:0005524(ATP binding);GO:0005634(nucleus);GO:0005654(nucleoplasm);GO:0005813(centrosome);GO:0005815(microtubule organizing center);GO:0005829(cytosol);GO:0005876…	04114(Oocyte meiosis);04914(Progesterone-mediated oocyte maturation);04914(Progesterone-mediated oocyte maturation)	K11481	EC:2.7.11.1	Ovis aries aurora kinase A (AURKA), mRNA. [Source:RefSeq mRNA;Acc:NM_001142507]	protein_coding	1841.16	1855.18	1864.17	2754.18	2338.05	2531.31	1891.79	1824.05	1816.84	4.30995e-17	2.76002e-16	yes
ENSOARG00020000943	MEIKIN	34800;34801	ENSOART00020001460;ENSOART00020001474	GO:0000776(kinetochore);GO:0051754(meiotic sister chromatid cohesion, centromeric);GO:0051754(meiotic sister chromatid cohesion, centromeric)				meiotic kinetochore factor [Source:HGNC Symbol;Acc:HGNC:51253]	protein_coding	77.236	76.0849	72.2782	51.0486	79.8157	64.0105	35.9206	36.4148	35.8558	4.34156e-15	2.3815e-14	yes
ENSOARG00020014923	TTK	39148	ENSOART00020022883	GO:0000776(kinetochore);GO:0004672(protein kinase activity);GO:0004712(protein serine/threonine/tyrosine kinase activity);GO:0005515(protein binding);GO:0005524(ATP binding);GO:0005737(cytoplasm);GO:0006468(protein phosphorylation);GO:0007094(mitotic spindle assembly checkpoint signaling);GO:0016321(female meiosis chromosome segregation);GO:0018105(peptidyl-serine phosphorylation);GO:0018107(pept…				TTK protein kinase [Source:HGNC Symbol;Acc:HGNC:12401]	protein_coding	52.7231	48.9687	52.462	80.6301	67.6301	78.8657	82.3345	82.3823	84.0654	1.6184e-14	8.43903e-14	yes
ENSOARG00020009483	NDC80	25975	ENSOART00020014565	GO:0000132(establishment of mitotic spindle orientation);GO:0000775(chromosome, centromeric region);GO:0000776(kinetochore);GO:0000940(outer kinetochore);GO:0005634(nucleus);GO:0005654(nucleoplasm);GO:0005694(chromosome);GO:0005813(centrosome);GO:0007049(cell cycle);GO:0007052(mitotic spindle organization);GO:0007059(chromosome segregation);GO:0008608(attachment of spindle microtubules to kinetoc…				NDC80 kinetochore complex component [Source:NCBI gene (formerly Entrezgene);Acc:101104623]	protein_coding	105.696	102.108	99.4182	116.122	140.476	120.886	154.202	152.318	151.257	3.29151e-10	1.17311e-09	yes
ENSOARG00020013528	TRIP13	15817	ENSOART00020020637	GO:0001556(oocyte maturation);GO:0001673(male germ cell nucleus);GO:0005524(ATP binding);GO:0006302(double-strand break repair);GO:0007094(mitotic spindle assembly checkpoint signaling);GO:0007130(synaptonemal complex assembly);GO:0007131(reciprocal meiotic recombination);GO:0007141(male meiosis I);GO:0007144(female meiosis I);GO:0007283(spermatogenesis);GO:0007286(spermatid development);GO:00168…				thyroid hormone receptor interactor 13 [Source:NCBI gene (formerly Entrezgene);Acc:101110620]	protein_coding	117.12	115.734	114.428	83.8887	73.0204	78.7677	100.009	101.046	106.928	7.2459e-09	2.26432e-08	yes
ENSOARG00020005754	WEE2	33642	ENSOART00020008932	GO:0000278(mitotic cell cycle);GO:0000287(magnesium ion binding);GO:0004672(protein kinase activity);GO:0004715(non-membrane spanning protein tyrosine kinase activity);GO:0005524(ATP binding);GO:0005634(nucleus);GO:0005654(nucleoplasm);GO:0005737(cytoplasm);GO:0005829(cytosol);GO:0005886(plasma membrane);GO:0006468(protein phosphorylation);GO:0007143(female meiotic nuclear division);GO:0035038(fe…				WEE2 oocyte meiosis inhibiting kinase [Source:HGNC Symbol;Acc:HGNC:19684]	protein_coding	98.3906	94.8045	93.5294	151.626	107.764	139.41	80.0909	89.3222	94.3578	1.54535e-07	4.18084e-07	yes
ENSOARG00020025753	MLH1	18313	ENSOART00020040431	GO:0003682(chromatin binding);GO:0003697(single-stranded DNA binding);GO:0005524(ATP binding);GO:0005634(nucleus);GO:0005654(nucleoplasm);GO:0006298(mismatch repair);GO:0016887(ATP hydrolysis activity);GO:0019899(enzyme binding);GO:0030983(mismatched DNA binding);GO:0032300(mismatch repair complex);GO:0032407(MutSalpha complex binding);GO:0140664(ATP-dependent DNA damage sensor activity)	01524(Platinum drug resistance);03430(Mismatch repair);03460(Fanconi anemia pathway);05200(Pathways in cancer);05210(Colorectal cancer);05213(Endometrial cancer);05226(Gastric cancer)			mutL homolog 1 [Source:NCBI gene (formerly Entrezgene);Acc:101108344]	protein_coding	42.1596	43.6153	42.1499	81.1047	49.3771	65.8079	40.0611	43.6472	43.9721	3.40842e-07	8.89212e-07	yes
ENSOARG00020024939	PLK1	26855	ENSOART00020039072	GO:0000070(mitotic sister chromatid segregation);GO:0000086(G2/M transition of mitotic cell cycle);GO:0000122(negative regulation of transcription by RNA polymerase II);GO:0000132(establishment of mitotic spindle orientation);GO:0000278(mitotic cell cycle);GO:0000281(mitotic cytokinesis);GO:0000287(magnesium ion binding);GO:0000775(chromosome, centromeric region);GO:0000776(kinetochore);GO:000077…	04068(FoxO signaling pathway);04110(Cell cycle);04114(Oocyte meiosis);04914(Progesterone-mediated oocyte maturation)	K06631	EC:2.7.11.21	polo like kinase 1 [Source:NCBI gene (formerly Entrezgene);Acc:101105713]	protein_coding	81.2014	82.6653	84.9218	68.5695	35.5698	53.6476	38.646	48.9721	53.3931	6.18787e-06	1.39106e-05	yes
ENSOARG00020008948	MASTL	10228	ENSOART00020013885	GO:0000086(G2/M transition of mitotic cell cycle);GO:0000278(mitotic cell cycle);GO:0004672(protein kinase activity);GO:0004674(protein serine/threonine kinase activity);GO:0005524(ATP binding);GO:0005634(nucleus);GO:0005654(nucleoplasm);GO:0005813(centrosome);GO:0006468(protein phosphorylation);GO:0007147(female meiosis II);GO:0016301(kinase activity);GO:0032154(cleavage furrow);GO:0032515(negat…		K16309	EC:2.7.11.1	microtubule associated serine/threonine kinase like [Source:NCBI gene (formerly Entrezgene);Acc:101119067]	protein_coding	9.83748	10.2052	9.23571	13.0715	16.5272	13.2536	10.2156	11.3678	10.3264	1.54123e-05	3.31168e-05	yes
ENSOARG00020020879	CCNB2	38322;38321	ENSOART00020032285;ENSOART00020032379	GO:0001701(in utero embryonic development);GO:0005737(cytoplasm);GO:0005813(centrosome);GO:0005829(cytosol);GO:0007049(cell cycle);GO:0007057(spindle assembly involved in female meiosis I);GO:0008315(G2/MI transition of meiotic cell cycle);GO:0015630(microtubule cytoskeleton);GO:0016020(membrane);GO:0016538(cyclin-dependent protein serine/threonine kinase regulator activity);GO:0040008(regulation…	04068(FoxO signaling pathway);04110(Cell cycle);04114(Oocyte meiosis);04115(p53 signaling pathway);04218(Cellular senescence);04914(Progesterone-mediated oocyte maturation);05166(Human T-cell leukemia virus 1 infection);05170(Human immunodeficiency virus 1 infection);05170(Human immunodeficiency virus 1 infection)			cyclin B2 [Source:NCBI gene (formerly Entrezgene);Acc:101115712]	protein_coding	632.775	619.062	608.694	637.576	543.72	588.903	686.879	734.144	727.729	0.000262987	0.000478239	yes
ENSOARG00020004952	NPR2	20020	ENSOART00020007712	GO:0000165(MAPK cascade);GO:0001541(ovarian follicle development);GO:0001549(cumulus cell differentiation);GO:0001568(blood vessel development);GO:0001570(vasculogenesis);GO:0001945(lymph vessel development);GO:0001958(endochondral ossification);GO:0001964(startle response);GO:0001974(blood vessel remodeling);GO:0002062(chondrocyte differentiation);GO:0003417(growth plate cartilage development);G…	00230(Purine metabolism);01100(Metabolic pathways);04022(cGMP-PKG signaling pathway);04270(Vascular smooth muscle contraction);04921(Oxytocin signaling pathway)	K12324	EC:4.6.1.2	natriuretic peptide receptor 2 [Source:NCBI gene (formerly Entrezgene);Acc:101112950]	protein_coding	0.799268	0.983136	1.06136	0.229951	0.179211	0.513427	0.362808	0.645764	0.37307	0.000316716	0.000569407	yes
ENSOARG00020024869	FBXO5	39925;39926	ENSOART00020038952;ENSOART00020038968	GO:0001556(oocyte maturation);GO:0005515(protein binding);GO:0005634(nucleus);GO:0005654(nucleoplasm);GO:0005737(cytoplasm);GO:0005819(spindle);GO:0006275(regulation of DNA replication);GO:0006974(cellular response to DNA damage stimulus);GO:0007057(spindle assembly involved in female meiosis I);GO:0007088(regulation of mitotic nuclear division);GO:0007346(regulation of mitotic cell cycle);GO:000…	04114(Oocyte meiosis);04114(Oocyte meiosis)			F-box protein 5 [Source:NCBI gene (formerly Entrezgene);Acc:101103731]	protein_coding	255.223	231.455	242.518	337.32	273.674	308.457	288.129	283.864	268.383	0.00054204	0.000941085	yes
ENSOARG00020020255	SEPTIN1	26994	ENSOART00020031194	GO:0005525(GTP binding);GO:0007056(spindle assembly involved in female meiosis);GO:0030496(midbody);GO:0042802(identical protein binding);GO:0051311(meiotic metaphase plate congression);GO:0072687(meiotic spindle)				septin 1 [Source:HGNC Symbol;Acc:HGNC:2879]	protein_coding	33.4677	30.5076	32.0254	61.6715	20.3205	38.7388	19.5096	23.3128	23.4063	0.0029093	0.0045811	yes
ENSOARG00020023582	PSMC3IP	7480	ENSOART00020036793	GO:0005654(nucleoplasm);GO:0007129(homologous chromosome pairing at meiosis);GO:0007131(reciprocal meiotic recombination);GO:0030374(nuclear receptor coactivator activity)				PSMC3 interacting protein [Source:NCBI gene (formerly Entrezgene);Acc:101103491]	protein_coding	64.6639	60.6386	62.8797	33.6496	54.9271	42.4619	41.9246	46.0403	54.0042	0.00330923	0.00517651	yes
ENSOARG00020010618	MEIOC	7355	ENSOART00020016339	GO:0005634(nucleus);GO:0005737(cytoplasm);GO:0006302(double-strand break repair);GO:0007130(synaptonemal complex assembly);GO:0007141(male meiosis I);GO:0007144(female meiosis I);GO:0007283(spermatogenesis);GO:0007286(spermatid development);GO:0048255(mRNA stabilization);GO:0048599(oocyte development);GO:0051310(metaphase plate congression);GO:0051321(meiotic cell cycle);GO:0051729(germline cell …				meiosis specific with coiled-coil domain [Source:NCBI gene (formerly Entrezgene);Acc:101117177]	protein_coding	9.45627	8.2859	8.07066	12.9033	7.19109	9.53666	13.1039	11.0593	11.4679	0.0192246	0.0266764	yes
ENSOARG00020022015	MARF1	26720	ENSOART00020035185	GO:0003676(nucleic acid binding);GO:0003723(RNA binding);GO:0004540(ribonuclease activity);GO:0005777(peroxisome);GO:0005794(Golgi apparatus);GO:0006302(double-strand break repair);GO:0007143(female meiotic nuclear division);GO:0010468(regulation of gene expression);GO:0043231(intracellular membrane-bounded organelle);GO:0048477(oogenesis);GO:1903231(mRNA base-pairing post-transcriptional repress…				meiosis regulator and mRNA stability factor 1 [Source:HGNC Symbol;Acc:HGNC:29562]	protein_coding	0.761009	0.604104	1.04485	0.519179	0.450802	0.457465	0.509559	0.83752	0.572182	0.0379553	0.0498896	yes
MII
ENSOARG00020005745	HSF2BP	5866	ENSOART00020008890	GO:0005694(chromosome)				heat shock transcription factor 2 binding protein [Source:NCBI gene (formerly Entrezgene);Acc:101106734]	protein_coding	101.597	91.5442	94.9353	67.2851	67.0907	64.9437	29.5852	28.903	32.906	2.30368e-57	1.22661e-55	yes
ENSOARG00020014512	SPO11	10933;10934	ENSOART00020022742;ENSOART00020022781	GO:0000781(chromosome, telomeric region);GO:0001541(ovarian follicle development);GO:0003677(DNA binding);GO:0003824(catalytic activity);GO:0003918(DNA topoisomerase type II (double strand cut, ATP-hydrolyzing) activity);GO:0005524(ATP binding);GO:0005694(chromosome);GO:0006259(DNA metabolic process);GO:0007129(homologous chromosome pairing at meiosis);GO:0007130(synaptonemal complex assembly);GO…				SPO11 initiator of meiotic double stranded breaks [Source:NCBI gene (formerly Entrezgene);Acc:101118122]	protein_coding	2.88113	3.49627	2.51877	12.2939	7.22592	11.0042	2.83151	2.17645	1.69352	3.63309e-19	2.69871e-18	yes
ENSOARG00020013528	TRIP13	15817	ENSOART00020020637	GO:0001556(oocyte maturation);GO:0001673(male germ cell nucleus);GO:0005524(ATP binding);GO:0006302(double-strand break repair);GO:0007094(mitotic spindle assembly checkpoint signaling);GO:0007130(synaptonemal complex assembly);GO:0007131(reciprocal meiotic recombination);GO:0007141(male meiosis I);GO:0007144(female meiosis I);GO:0007283(spermatogenesis);GO:0007286(spermatid development);GO:00168…				thyroid hormone receptor interactor 13 [Source:NCBI gene (formerly Entrezgene);Acc:101110620]	protein_coding	117.12	115.734	114.428	83.8887	73.0204	78.7677	100.009	101.046	106.928	7.2459e-09	2.26432e-08	yes
ENSOARG00020024939	PLK1	26855	ENSOART00020039072	GO:0000070(mitotic sister chromatid segregation);GO:0000086(G2/M transition of mitotic cell cycle);GO:0000122(negative regulation of transcription by RNA polymerase II);GO:0000132(establishment of mitotic spindle orientation);GO:0000278(mitotic cell cycle);GO:0000281(mitotic cytokinesis);GO:0000287(magnesium ion binding);GO:0000775(chromosome, centromeric region);GO:0000776(kinetochore);GO:000077…	04068(FoxO signaling pathway);04110(Cell cycle);04114(Oocyte meiosis);04914(Progesterone-mediated oocyte maturation)	K06631	EC:2.7.11.21	polo like kinase 1 [Source:NCBI gene (formerly Entrezgene);Acc:101105713]	protein_coding	81.2014	82.6653	84.9218	68.5695	35.5698	53.6476	38.646	48.9721	53.3931	6.18787e-06	1.39106e-05	yes
ENSOARG00020008948	MASTL	10228	ENSOART00020013885	GO:0000086(G2/M transition of mitotic cell cycle);GO:0000278(mitotic cell cycle);GO:0004672(protein kinase activity);GO:0004674(protein serine/threonine kinase activity);GO:0005524(ATP binding);GO:0005634(nucleus);GO:0005654(nucleoplasm);GO:0005813(centrosome);GO:0006468(protein phosphorylation);GO:0007147(female meiosis II);GO:0016301(kinase activity);GO:0032154(cleavage furrow);GO:0032515(negat…		K16309	EC:2.7.11.1	microtubule associated serine/threonine kinase like [Source:NCBI gene (formerly Entrezgene);Acc:101119067]	protein_coding	9.83748	10.2052	9.23571	13.0715	16.5272	13.2536	10.2156	11.3678	10.3264	1.54123e-05	3.31168e-05	yes
ENSOARG00020020879	CCNB2	38322;38321	ENSOART00020032285;ENSOART00020032379	GO:0001701(in utero embryonic development);GO:0005737(cytoplasm);GO:0005813(centrosome);GO:0005829(cytosol);GO:0007049(cell cycle);GO:0007057(spindle assembly involved in female meiosis I);GO:0008315(G2/MI transition of meiotic cell cycle);GO:0015630(microtubule cytoskeleton);GO:0016020(membrane);GO:0016538(cyclin-dependent protein serine/threonine kinase regulator activity);GO:0040008(regulation…	04068(FoxO signaling pathway);04110(Cell cycle);04114(Oocyte meiosis);04115(p53 signaling pathway);04218(Cellular senescence);04914(Progesterone-mediated oocyte maturation);05166(Human T-cell leukemia virus 1 infection);05170(Human immunodeficiency virus 1 infection);05170(Human immunodeficiency virus 1 infection)			cyclin B2 [Source:NCBI gene (formerly Entrezgene);Acc:101115712]	protein_coding	632.775	619.062	608.694	637.576	543.72	588.903	686.879	734.144	727.729	0.000262987	0.000478239	yes

## Sheet: Table S6
Table S6. Summary of oocyte maturation-related genes information in sheep oocytes
gene_id	gene_name	EntrezID	transcript_id	GO	KEGG	KO_ENTRY	EC	Description	trans_type	FPKM.LO_1	FPKM.LO_2	FPKM.LO_3	FPKM.MO_1	FPKM.MO_2	FPKM.MO_3	FPKM.SO_1	FPKM.SO_2	FPKM.SO_3	pval	qval	significant
ENSOARG00020009236	GRB14	21088	ENSOART00020014261	GO:0005737(cytoplasm);GO:0005886(plasma membrane);GO:0007165(signal transduction);GO:0030674(protein-macromolecule adaptor activity);GO:0030971(receptor tyrosine kinase binding);GO:0043231(intracellular membrane-bounded organelle);GO:0046627(negative regulation of insulin receptor signaling pathway)				growth factor receptor bound protein 14 [Source:NCBI gene (formerly Entrezgene);Acc:101105217]	protein_coding	10.3372	13.0788	12.3498	1.90926	3.02422	1.78433	0.429969	0.650206	1.14381	3.52206e-43	1.01417e-41	yes
ENSOARG00020012408	BMP15	653	ENSOART00020018955	GO:0005576(extracellular region);GO:0007165(signal transduction);GO:0008083(growth factor activity)	04060(Cytokine-cytokine receptor interaction);04913(Ovarian steroidogenesis)			Ovis aries bone morphogenetic protein 15 (BMP15), mRNA. [Source:RefSeq mRNA;Acc:NM_001114767]	protein_coding	314.883	306.406	315.616	308.31	238.427	278.093	124.557	138.409	128.879	1.5164e-36	3.21858e-35	yes
ENSOARG00020008020	TUT4	2554;2555	ENSOART00020012309;ENSOART00020012604	GO:0003676(nucleic acid binding);GO:0005730(nucleolus);GO:0005829(cytosol);GO:0008270(zinc ion binding);GO:0016779(nucleotidyltransferase activity);GO:0016779(nucleotidyltransferase activity)		K13291	EC:2.7.7.52	terminal uridylyl transferase 4 [Source:NCBI gene (formerly Entrezgene);Acc:101115584]	protein_coding	2.72871	2.4136	2.60173	0.299287	0.7662	0.714824	0.327957	0.2808	0.282561	1.1057e-28	1.51944e-27	yes
ENSOARG00020009456	REC8	37778	ENSOART00020014626	GO:0000724(double-strand break repair via homologous recombination);GO:0000776(kinetochore);GO:0000779(condensed chromosome, centromeric region);GO:0000793(condensed chromosome);GO:0000794(condensed nuclear chromosome);GO:0000795(synaptonemal complex);GO:0000800(lateral element);GO:0001556(oocyte maturation);GO:0001673(male germ cell nucleus);GO:0005515(protein binding);GO:0005634(nucleus);GO:000…				REC8 meiotic recombination protein [Source:HGNC Symbol;Acc:HGNC:16879]	protein_coding	26.9164	30.6074	28.2164	66.4788	54.0574	61.7448	51.3664	53.6814	53.7903	3.2523e-27	4.06225e-26	yes
ENSOARG00020024118	SIRT2	12463	ENSOART00020037662	GO:0000122(negative regulation of transcription by RNA polymerase II);GO:0003682(chromatin binding);GO:0003950(NAD+ ADP-ribosyltransferase activity);GO:0004407(histone deacetylase activity);GO:0005634(nucleus);GO:0005694(chromosome);GO:0005730(nucleolus);GO:0005737(cytoplasm);GO:0005739(mitochondrion);GO:0005813(centrosome);GO:0005814(centriole);GO:0005819(spindle);GO:0005829(cytosol);GO:0005874(…				sirtuin 2 [Source:HGNC Symbol;Acc:HGNC:10886]	protein_coding	7.87512	6.93117	7.58296	5.28218	3.21784	3.51028	1.27789	1.98046	1.71546	3.44936e-18	2.40463e-17	yes
ENSOARG00020015608	AURKA	10947;10948	ENSOART00020024001;ENSOART00020024149	GO:0000212(meiotic spindle organization);GO:0000226(microtubule cytoskeleton organization);GO:0000278(mitotic cell cycle);GO:0000922(spindle pole);GO:0004672(protein kinase activity);GO:0004674(protein serine/threonine kinase activity);GO:0005524(ATP binding);GO:0005634(nucleus);GO:0005654(nucleoplasm);GO:0005813(centrosome);GO:0005815(microtubule organizing center);GO:0005829(cytosol);GO:0005876…	04114(Oocyte meiosis);04914(Progesterone-mediated oocyte maturation);04914(Progesterone-mediated oocyte maturation)	K11481	EC:2.7.11.1	Ovis aries aurora kinase A (AURKA), mRNA. [Source:RefSeq mRNA;Acc:NM_001142507]	protein_coding	1841.16	1855.18	1864.17	2754.18	2338.05	2531.31	1891.79	1824.05	1816.84	4.30995e-17	2.76002e-16	yes
ENSOARG00020009774	ZAR1	36711;36709	ENSOART00020015475;ENSOART00020015165					zygote arrest 1 [Source:HGNC Symbol;Acc:HGNC:20436]	protein_coding	227.657	230.642	218.739	171.047	128.456	144.078	268.757	253.127	248.437	2.96173e-13	1.37853e-12	yes
ENSOARG00020002752	TUT7	19658;19655;19657	ENSOART00020004431;ENSOART00020004291;ENSOART00020004419	GO:0003676(nucleic acid binding);GO:0005654(nucleoplasm);GO:0005737(cytoplasm);GO:0005829(cytosol);GO:0008270(zinc ion binding);GO:0010586(miRNA metabolic process);GO:0016779(nucleotidyltransferase activity);GO:0031054(pre-miRNA processing);GO:0031123(RNA 3'-end processing);GO:0035198(miRNA binding);GO:0050265(RNA uridylyltransferase activity);GO:0070569(uridylyltransferase activity);GO:0071076(R…		K13291	EC:2.7.7.52	terminal uridylyl transferase 7 [Source:NCBI gene (formerly Entrezgene);Acc:101114240]	protein_coding	7.17149	6.91912	6.88499	9.16763	8.86323	8.2181	11.1568	11.3388	11.0852	1.59014e-11	6.38797e-11	yes
ENSOARG00020011526	PABPC1L	11297	ENSOART00020017581	GO:0001556(oocyte maturation);GO:0003676(nucleic acid binding);GO:0003723(RNA binding);GO:0006338(chromatin remodeling);GO:0006378(mRNA polyadenylation);GO:0045815(epigenetic maintenance of chromatin in transcription-competent conformation);GO:0051647(nucleus localization)				poly(A) binding protein cytoplasmic 1 like [Source:HGNC Symbol;Acc:HGNC:15797]	protein_coding	27.266	26.5691	24.9376	17.3929	12.8923	16.3197	26.0445	25.5731	30.1097	1.76647e-11	7.06186e-11	yes
ENSOARG00020010382	FOXO3	39379	ENSOART00020015898	GO:0003700(DNA-binding transcription factor activity);GO:0006355(regulation of DNA-templated transcription);GO:0043565(sequence-specific DNA binding)	01521(EGFR tyrosine kinase inhibitor resistance);04062(Chemokine signaling pathway);04068(FoxO signaling pathway);04137(Mitophagy - animal);04151(PI3K-Akt signaling pathway);04152(AMPK signaling pathway);04211(Longevity regulating pathway);04213(Longevity regulating pathway - multiple species);04218(Cellular senescence);04722(Neurotrophin signaling pathway);04917(Prolactin signaling pathway);0521…			Ovis aries forkhead box O3 (FOXO3), mRNA. [Source:RefSeq mRNA;Acc:NM_001267889]	protein_coding	54.8444	61.5135	61.3078	44.9107	29.8552	34.4456	24.8987	33.0021	36.8202	2.07281e-09	6.85187e-09	yes
ENSOARG00020013528	TRIP13	15817	ENSOART00020020637	GO:0001556(oocyte maturation);GO:0001673(male germ cell nucleus);GO:0005524(ATP binding);GO:0006302(double-strand break repair);GO:0007094(mitotic spindle assembly checkpoint signaling);GO:0007130(synaptonemal complex assembly);GO:0007131(reciprocal meiotic recombination);GO:0007141(male meiosis I);GO:0007144(female meiosis I);GO:0007283(spermatogenesis);GO:0007286(spermatid development);GO:00168…				thyroid hormone receptor interactor 13 [Source:NCBI gene (formerly Entrezgene);Acc:101110620]	protein_coding	117.12	115.734	114.428	83.8887	73.0204	78.7677	100.009	101.046	106.928	7.2459e-09	2.26432e-08	yes
ENSOARG00020005754	WEE2	33642	ENSOART00020008932	GO:0000278(mitotic cell cycle);GO:0000287(magnesium ion binding);GO:0004672(protein kinase activity);GO:0004715(non-membrane spanning protein tyrosine kinase activity);GO:0005524(ATP binding);GO:0005634(nucleus);GO:0005654(nucleoplasm);GO:0005737(cytoplasm);GO:0005829(cytosol);GO:0005886(plasma membrane);GO:0006468(protein phosphorylation);GO:0007143(female meiotic nuclear division);GO:0035038(fe…				WEE2 oocyte meiosis inhibiting kinase [Source:HGNC Symbol;Acc:HGNC:19684]	protein_coding	98.3906	94.8045	93.5294	151.626	107.764	139.41	80.0909	89.3222	94.3578	1.54535e-07	4.18084e-07	yes
ENSOARG00020000569	PDE3A	31653	ENSOART00020000759	GO:0001556(oocyte maturation);GO:0004114(3',5'-cyclic-nucleotide phosphodiesterase activity);GO:0004115(3',5'-cyclic-AMP phosphodiesterase activity);GO:0004119(cGMP-inhibited cyclic-nucleotide phosphodiesterase activity);GO:0005829(cytosol);GO:0007165(signal transduction);GO:0008081(phosphoric diester hydrolase activity);GO:0009410(response to xenobiotic stimulus);GO:0016020(membrane);GO:0019933(…				phosphodiesterase 3A [Source:HGNC Symbol;Acc:HGNC:8778]	protein_coding	5.51556	5.51483	5.78995	5.88438	6.14813	4.64897	8.51015	9.07131	7.56953	3.15263e-06	7.30803e-06	yes
ENSOARG00020017875	YTHDF2	22124	ENSOART00020027539	GO:0000932(P-body);GO:0001556(oocyte maturation);GO:0003723(RNA binding);GO:0005634(nucleus);GO:0005737(cytoplasm);GO:0005829(cytosol);GO:0006402(mRNA catabolic process);GO:0007276(gamete generation);GO:0007284(spermatogonial cell division);GO:0010494(cytoplasmic stress granule);GO:0030155(regulation of cell adhesion);GO:0034063(stress granule assembly);GO:0034451(centriolar satellite);GO:0036464…				YTH N6-methyladenosine RNA binding protein 2 [Source:NCBI gene (formerly Entrezgene);Acc:101122840]	protein_coding	7.41526	7.25346	5.907	4.34777	6.02247	6.42948	9.21967	10.4367	8.94972	1.2763e-05	2.76509e-05	yes
ENSOARG00020018672	H3F3A	9157;9156	ENSOART00020028791;ENSOART00020028725	GO:0000781(chromosome, telomeric region);GO:0000786(nucleosome);GO:0003677(DNA binding);GO:0005634(nucleus);GO:0030527(structural constituent of chromatin);GO:0046982(protein heterodimerization activity);GO:0046982(protein heterodimerization activity)	05034(Alcoholism);05202(Transcriptional misregulation in cancer);05322(Systemic lupus erythematosus);05322(Systemic lupus erythematosus)			histone H3.3 [Source:NCBI gene (formerly Entrezgene);Acc:101108931]	protein_coding	518.208	530.65	523.275	732.35	606.053	671.505	581.514	598.791	592.595	3.05098e-05	6.30458e-05	yes
ENSOARG00020004952	NPR2	20020	ENSOART00020007712	GO:0000165(MAPK cascade);GO:0001541(ovarian follicle development);GO:0001549(cumulus cell differentiation);GO:0001568(blood vessel development);GO:0001570(vasculogenesis);GO:0001945(lymph vessel development);GO:0001958(endochondral ossification);GO:0001964(startle response);GO:0001974(blood vessel remodeling);GO:0002062(chondrocyte differentiation);GO:0003417(growth plate cartilage development);G…	00230(Purine metabolism);01100(Metabolic pathways);04022(cGMP-PKG signaling pathway);04270(Vascular smooth muscle contraction);04921(Oxytocin signaling pathway)	K12324	EC:4.6.1.2	natriuretic peptide receptor 2 [Source:NCBI gene (formerly Entrezgene);Acc:101112950]	protein_coding	0.799268	0.983136	1.06136	0.229951	0.179211	0.513427	0.362808	0.645764	0.37307	0.000316716	0.000569407	yes
ENSOARG00020024869	FBXO5	39925;39926	ENSOART00020038952;ENSOART00020038968	GO:0001556(oocyte maturation);GO:0005515(protein binding);GO:0005634(nucleus);GO:0005654(nucleoplasm);GO:0005737(cytoplasm);GO:0005819(spindle);GO:0006275(regulation of DNA replication);GO:0006974(cellular response to DNA damage stimulus);GO:0007057(spindle assembly involved in female meiosis I);GO:0007088(regulation of mitotic nuclear division);GO:0007346(regulation of mitotic cell cycle);GO:000…	04114(Oocyte meiosis);04114(Oocyte meiosis)			F-box protein 5 [Source:NCBI gene (formerly Entrezgene);Acc:101103731]	protein_coding	255.223	231.455	242.518	337.32	273.674	308.457	288.129	283.864	268.383	0.00054204	0.000941085	yes
ENSOARG00020010273	H3F3A	6957	ENSOART00020015747	GO:0000781(chromosome, telomeric region);GO:0000786(nucleosome);GO:0003677(DNA binding);GO:0005634(nucleus);GO:0030527(structural constituent of chromatin);GO:0046982(protein heterodimerization activity)	05034(Alcoholism);05202(Transcriptional misregulation in cancer);05322(Systemic lupus erythematosus)			histone H3.3 [Source:NCBI gene (formerly Entrezgene);Acc:101108931]	protein_coding	4662.45	4539.92	4533.67	3283.36	5463.26	4394.91	3183.79	3580.2	3586.45	0.00153368	0.00251801	yes
ENSOARG00020009650	IGF1	31342;31346;31345	ENSOART00020015334;ENSOART00020015614;ENSOART00020015775	GO:0001775(cell activation);GO:0005158(insulin receptor binding);GO:0005159(insulin-like growth factor receptor binding);GO:0005178(integrin binding);GO:0005179(hormone activity);GO:0005576(extracellular region);GO:0005615(extracellular space);GO:0007165(signal transduction);GO:0008083(growth factor activity);GO:0008283(cell population proliferation);GO:0008284(positive regulation of cell populat…	01521(EGFR tyrosine kinase inhibitor resistance);01522(Endocrine resistance);04010(MAPK signaling pathway);04014(Ras signaling pathway);04015(Rap1 signaling pathway);04066(HIF-1 signaling pathway);04068(FoxO signaling pathway);04114(Oocyte meiosis);04115(p53 signaling pathway);04150(mTOR signaling pathway);04151(PI3K-Akt signaling pathway);04152(AMPK signaling pathway);04211(Longevity regulating …			insulin like growth factor 1 [Source:NCBI gene (formerly Entrezgene);Acc:443318]	protein_coding	1.0714	0.694085	0.539355	1.63131	1.70531	1.68156	0.993896	0.784724	0.847271	0.00226832	0.00362303	yes
ENSOARG00020006354	INSL3	34136	ENSOART00020009837	GO:0002020(protease binding);GO:0005179(hormone activity);GO:0005576(extracellular region);GO:0007165(signal transduction);GO:0010634(positive regulation of epithelial cell migration);GO:0090303(positive regulation of wound healing)				insulin like 3 [Source:HGNC Symbol;Acc:HGNC:6086]	protein_coding	1.96415	2.59875	1.68631	1.24489	0.523391	0.768972	0	0	0.551747	0.00250121	0.00396884	yes
ENSOARG00020010489	WASHC5	40403;40405	ENSOART00020016073;ENSOART00020016628	GO:0001556(oocyte maturation);GO:0005654(nucleoplasm);GO:0005768(endosome);GO:0005769(early endosome);GO:0007040(lysosome organization);GO:0016197(endosomal transport);GO:0031503(protein-containing complex localization);GO:0040038(polar body extrusion after meiotic divisions);GO:0043933(protein-containing complex organization);GO:0051125(regulation of actin nucleation);GO:0071203(WASH complex);GO…	04144(Endocytosis);04144(Endocytosis)			WASH complex subunit 5 [Source:NCBI gene (formerly Entrezgene);Acc:101104670]	protein_coding	6.19941	5.83318	5.47105	8.33884	5.45764	6.93174	7.80548	7.23785	7.23796	0.0359243	0.0474319	yes

## Sheet: Table S7
Table S7. Summary of maternal-effect genes information in sheep oocytes
gene_id	gene_name	EntrezID	transcript_id	GO	KEGG	KO_ENTRY	EC	Description	trans_type	FPKM.LO_1	FPKM.LO_2	FPKM.LO_3	FPKM.MO_1	FPKM.MO_2	FPKM.MO_3	FPKM.SO_1	FPKM.SO_2	FPKM.SO_3	pval	qval	significant
ENSOARG00020022169	AGRP	12064	ENSOART00020034341	GO:0005102(signaling receptor binding);GO:0005184(neuropeptide hormone activity);GO:0005576(extracellular region);GO:0005615(extracellular space);GO:0005796(Golgi lumen);GO:0007218(neuropeptide signaling pathway);GO:0008343(adult feeding behavior);GO:0009755(hormone-mediated signaling pathway);GO:0060259(regulation of feeding behavior)	04920(Adipocytokine signaling pathway)			agouti related neuropeptide [Source:NCBI gene (formerly Entrezgene);Acc:443269]	protein_coding	53.1719	58.8316	55.3179	138.599	154.887	150.721	192.213	208.375	224.437	2.08261e-72	2.12616e-70	yes
ENSOARG00020002343	GET1	5797	ENSOART00020003586	GO:0043529(GET complex);GO:0045048(protein insertion into ER membrane);GO:0050821(protein stabilization);GO:0071816(tail-anchored membrane protein insertion into ER membrane)				guided entry of tail-anchored proteins factor 1 [Source:NCBI gene (formerly Entrezgene);Acc:101122827]	protein_coding	102.081	93.9552	95.8414	76.3846	66.9944	72.7929	25.9463	29.5963	26.6109	2.47944e-64	1.76026e-62	yes
ENSOARG00020009787	IHH	21781	ENSOART00020015025	GO:0001501(skeletal system development);GO:0001503(ossification);GO:0001569(branching involved in blood vessel morphogenesis);GO:0001649(osteoblast differentiation);GO:0001701(in utero embryonic development);GO:0001708(cell fate specification);GO:0001763(morphogenesis of a branching structure);GO:0001944(vasculature development);GO:0001947(heart looping);GO:0002053(positive regulation of mesenchy…	04340(Hedgehog signaling pathway);05205(Proteoglycans in cancer)			Indian hedgehog signaling molecule [Source:NCBI gene (formerly Entrezgene);Acc:101113658]	protein_coding	4.16105	3.40241	4.65413	0.128831	0.794957	0.342855	0	0	0	3.16098e-33	5.51519e-32	yes
ENSOARG00020008137	GRB10	32454	ENSOART00020012692	GO:0005158(insulin receptor binding);GO:0007165(signal transduction);GO:0010467(gene expression);GO:0030159(signaling receptor complex adaptor activity);GO:0030178(negative regulation of Wnt signaling pathway);GO:0030674(protein-macromolecule adaptor activity);GO:0030949(positive regulation of vascular endothelial growth factor receptor signaling pathway);GO:0032991(protein-containing complex);GO…	04150(mTOR signaling pathway)			growth factor receptor bound protein 10 [Source:NCBI gene (formerly Entrezgene);Acc:101111275]	protein_coding	21.7098	23.0513	21.6374	8.12464	12.091	9.64499	28.3558	28.7386	27.2505	3.12643e-31	4.95774e-30	yes
ENSOARG00020005385	CBS	5859	ENSOART00020008548	GO:0001958(endochondral ossification);GO:0001974(blood vessel remodeling);GO:0004122(cystathionine beta-synthase activity);GO:0005634(nucleus);GO:0005737(cytoplasm);GO:0006535(cysteine biosynthetic process from serine);GO:0006563(L-serine metabolic process);GO:0006565(L-serine catabolic process);GO:0006801(superoxide metabolic process);GO:0010749(regulation of nitric oxide mediated signal transdu…				cystathionine beta-synthase [Source:HGNC Symbol;Acc:HGNC:1550]	protein_coding	7.22487	5.35712	6.76513	2.80748	1.89789	2.44848	0.86876	1.0016	0.820326	1.9412e-30	2.94228e-29	yes
ENSOARG00020026206	OOEP	40100	ENSOART00020041240	GO:0003723(RNA binding);GO:0005634(nucleus);GO:0005737(cytoplasm);GO:0032991(protein-containing complex);GO:0106333(subcortical maternal complex)				Ovis aries oocyte expressed protein (OOEP), mRNA. [Source:RefSeq mRNA;Acc:NM_001287467]	protein_coding	3348.45	3424.15	3365.66	4954.59	4274.48	4575.5	4948.17	5689.89	5938.79	3.09885e-25	3.3579e-24	yes
ENSOARG00020019097	SDHD	13794;13795;13792	ENSOART00020029552;ENSOART00020029599;ENSOART00020029440	GO:0005739(mitochondrion);GO:0005740(mitochondrial envelope);GO:0005743(mitochondrial inner membrane);GO:0006099(tricarboxylic acid cycle);GO:0008177(succinate dehydrogenase (ubiquinone) activity);GO:0016020(membrane);GO:0045257(succinate dehydrogenase complex (ubiquinone));GO:0050433(regulation of catecholamine secretion);GO:0071456(cellular response to hypoxia);GO:0071456(cellular response to h…				succinate dehydrogenase complex subunit D [Source:HGNC Symbol;Acc:HGNC:10683]	protein_coding	50.902	49.8095	53.8091	57.5265	54.6822	52.3179	28.8865	25.1943	26.0158	2.12003e-24	2.18239e-23	yes
ENSOARG00020015364	LNPEP	35998	ENSOART00020023846	GO:0005886(plasma membrane);GO:0006508(proteolysis);GO:0008237(metallopeptidase activity);GO:0008270(zinc ion binding)				leucyl and cystinyl aminopeptidase [Source:HGNC Symbol;Acc:HGNC:6656]	protein_coding	4.56189	4.75748	4.845	8.91469	7.15141	8.44724	11.5133	11.7157	10.8443	4.56306e-24	4.61272e-23	yes
ENSOARG00020003405	UBE3A	17089	ENSOART00020005165	GO:0000209(protein polyubiquitination);GO:0004842(ubiquitin-protein transferase activity);GO:0006511(ubiquitin-dependent protein catabolic process);GO:0061630(ubiquitin protein ligase activity)	04120(Ubiquitin mediated proteolysis);05165(Human papillomavirus infection);05203(Viral carcinogenesis)	K10587	EC:2.3.2.26	ubiquitin protein ligase E3A [Source:NCBI gene (formerly Entrezgene);Acc:101114391]	protein_coding	14.7696	12.5282	14.3044	13.054	9.67244	12.5028	26.2705	25.1998	24.3357	7.28534e-21	6.07259e-20	yes
ENSOARG00020024380	ANGPT2	28042	ENSOART00020038136	GO:0001525(angiogenesis);GO:0005576(extracellular region);GO:0005615(extracellular space);GO:0010467(gene expression);GO:0010812(negative regulation of cell-substrate adhesion);GO:0016525(negative regulation of angiogenesis);GO:0030971(receptor tyrosine kinase binding);GO:0043537(negative regulation of blood vessel endothelial cell migration);GO:0048014(Tie signaling pathway);GO:0048514(blood ves…	04010(MAPK signaling pathway);04014(Ras signaling pathway);04015(Rap1 signaling pathway);04066(HIF-1 signaling pathway);04151(PI3K-Akt signaling pathway);05167(Kaposi sarcoma-associated herpesvirus infection)			angiopoietin 2 [Source:NCBI gene (formerly Entrezgene);Acc:497273]	protein_coding	2.55003	2.68776	2.63221	0.361112	1.44417	0.732927	0	0.122004	0	2.43681e-17	1.58181e-16	yes
ENSOARG00020007810	IGF2R	40008;40013;40011;40010	ENSOART00020040502;ENSOART00020040585;ENSOART00020040539;ENSOART00020040524	GO:0005520(insulin-like growth factor binding);GO:0005537(mannose binding);GO:0005634(nucleus);GO:0005641(nuclear envelope lumen);GO:0005768(endosome);GO:0005769(early endosome);GO:0005770(late endosome);GO:0005794(Golgi apparatus);GO:0005802(trans-Golgi network);GO:0007041(lysosomal transport);GO:0009986(cell surface);GO:0010008(endosome membrane);GO:0016020(membrane);GO:0030139(endocytic vesicl…				insulin like growth factor 2 receptor [Source:HGNC Symbol;Acc:HGNC:5467]	protein_coding	0.936383	1.0703	0.935533	0.327961	0.307232	0.314547	0.714812	0.921094	1.07341	4.17589e-14	2.0995e-13	yes
ENSOARG00020023047	CRHBP	37517;37516	ENSOART00020035863;ENSOART00020035812	GO:0005615(extracellular space);GO:0006954(inflammatory response);GO:0007565(female pregnancy);GO:0009755(hormone-mediated signaling pathway);GO:0030141(secretory granule);GO:0035865(cellular response to potassium ion);GO:0045055(regulated exocytosis);GO:0048149(behavioral response to ethanol);GO:0051424(corticotropin-releasing hormone binding);GO:0051459(regulation of corticotropin secretion);GO…				Ovis aries corticotropin releasing hormone binding protein (CRHBP), mRNA. [Source:RefSeq mRNA;Acc:NM_001009339]	protein_coding	19.5918	15.9802	16.5601	12.5984	13.9433	12.4402	7.66459	7.25869	6.99875	1.29764e-13	6.21547e-13	yes
ENSOARG00020009774	ZAR1	36711;36709	ENSOART00020015475;ENSOART00020015165					zygote arrest 1 [Source:HGNC Symbol;Acc:HGNC:20436]	protein_coding	227.657	230.642	218.739	171.047	128.456	144.078	268.757	253.127	248.437	2.96173e-13	1.37853e-12	yes
ENSOARG00020019242	RGS2	9011	ENSOART00020029553	GO:0001965(G-protein alpha-subunit binding);GO:0005096(GTPase activator activity);GO:0005634(nucleus);GO:0005730(nucleolus);GO:0005737(cytoplasm);GO:0005829(cytosol);GO:0005886(plasma membrane);GO:0006417(regulation of translation);GO:0007049(cell cycle);GO:0007283(spermatogenesis);GO:0008277(regulation of G protein-coupled receptor signaling pathway);GO:0009898(cytoplasmic side of plasma membran…	04022(cGMP-PKG signaling pathway);04740(Olfactory transduction);04921(Oxytocin signaling pathway)			regulator of G protein signaling 2 [Source:NCBI gene (formerly Entrezgene);Acc:443163]	protein_coding	522.339	505.486	504.322	592.447	578.747	604.051	397.74	393.482	401.558	6.21681e-13	2.82755e-12	yes
ENSOARG00020016893	MBD2	26178;26181;26182;26179;26177	ENSOART00020026174;ENSOART00020026349;ENSOART00020026393;ENSOART00020026229;ENSOART00020026090	GO:0000118(histone deacetylase complex);GO:0000122(negative regulation of transcription by RNA polymerase II);GO:0000785(chromatin);GO:0000792(heterochromatin);GO:0003677(DNA binding);GO:0003682(chromatin binding);GO:0003729(mRNA binding);GO:0005634(nucleus);GO:0005654(nucleoplasm);GO:0005737(cytoplasm);GO:0005829(cytosol);GO:0006338(chromatin remodeling);GO:0006346(DNA methylation-dependent hete…				methyl-CpG binding domain protein 2 [Source:NCBI gene (formerly Entrezgene);Acc:494443]	protein_coding	4.95647	4.80146	4.95911	1.55641	2.30617	1.41673	1.93749	2.05961	1.88788	3.55814e-12	1.51984e-11	yes
ENSOARG00020005894	NR2F2	17153;17152	ENSOART00020009180;ENSOART00020009153	GO:0000122(negative regulation of transcription by RNA polymerase II);GO:0001701(in utero embryonic development);GO:0001764(neuron migration);GO:0001893(maternal placenta development);GO:0001937(negative regulation of endothelial cell proliferation);GO:0001945(lymph vessel development);GO:0001972(retinoic acid binding);GO:0003677(DNA binding);GO:0003700(DNA-binding transcription factor activity);…				nuclear receptor subfamily 2 group F member 2 [Source:NCBI gene (formerly Entrezgene);Acc:100286739]	protein_coding	2.33166	2.0798	2.37565	1.6975	1.54961	1.85508	3.63891	3.985	3.8692	1.25003e-10	4.60807e-10	yes
ENSOARG00020006563	BMPR2	21571;21570	ENSOART00020010136;ENSOART00020010182	GO:0001649(osteoblast differentiation);GO:0001707(mesoderm formation);GO:0001893(maternal placenta development);GO:0001935(endothelial cell proliferation);GO:0001938(positive regulation of endothelial cell proliferation);GO:0001946(lymphangiogenesis);GO:0001974(blood vessel remodeling);GO:0002063(chondrocyte development);GO:0003085(negative regulation of systemic arterial blood pressure);GO:00031…				bone morphogenetic protein receptor type 2 [Source:HGNC Symbol;Acc:HGNC:1078]	protein_coding	3.51603	3.7401	2.95416	4.07589	2.4649	3.22697	6.71731	7.27416	6.03071	5.28844e-10	1.85328e-09	yes
ENSOARG00020013342	LDOC1	1325	ENSOART00020020337	GO:0001893(maternal placenta development);GO:0005654(nucleoplasm);GO:0005730(nucleolus);GO:0060137(maternal process involved in parturition);GO:0071222(cellular response to lipopolysaccharide);GO:0071225(cellular response to muramyl dipeptide);GO:1903547(regulation of growth hormone activity)				LDOC1 regulator of NFKB signaling [Source:NCBI gene (formerly Entrezgene);Acc:101121572]	protein_coding	2.85879	3.56781	3.7044	0.578358	0.309851	0.302086	0	0.173169	0.161738	8.16341e-10	2.80977e-09	yes
ENSOARG00020020218	PPP1R9A	32567	ENSOART00020031161	GO:0005515(protein binding);GO:0007015(actin filament organization);GO:0019722(calcium-mediated signaling);GO:0030175(filopodium);GO:0030864(cortical actin cytoskeleton);GO:0043197(dendritic spine);GO:0050804(modulation of chemical synaptic transmission)				protein phosphatase 1 regulatory subunit 9A [Source:NCBI gene (formerly Entrezgene);Acc:101115785]	protein_coding	0.659135	0.87832	0.720959	0	0.113389	0.0872441	0.14752	0.173466	0.136282	2.59593e-09	8.47228e-09	yes
ENSOARG00020021837	KPNA6	22052;22053	ENSOART00020033859;ENSOART00020033810	GO:0005515(protein binding);GO:0005737(cytoplasm);GO:0006366(transcription by RNA polymerase II);GO:0006606(protein import into nucleus);GO:0019079(viral genome replication);GO:0030682(mitigation of host defenses by symbiont);GO:0042564(NLS-dependent protein nuclear import complex);GO:0045944(positive regulation of transcription by RNA polymerase II);GO:0060135(maternal process involved in female…	05164(Influenza A);05164(Influenza A)			karyopherin subunit alpha 6 [Source:NCBI gene (formerly Entrezgene);Acc:101117141]	protein_coding	4.49949	4.4926	4.5345	3.4064	2.29942	2.55433	2.35754	1.78739	1.69084	1.12209e-07	3.08232e-07	yes
ENSOARG00020021901	BICC1	27611;27610	ENSOART00020033893;ENSOART00020033976	GO:0001822(kidney development);GO:0003676(nucleic acid binding);GO:0003723(RNA binding);GO:0005515(protein binding);GO:0007368(determination of left/right symmetry);GO:0007507(heart development);GO:0090090(negative regulation of canonical Wnt signaling pathway);GO:0090090(negative regulation of canonical Wnt signaling pathway)				BicC family RNA binding protein 1 [Source:NCBI gene (formerly Entrezgene);Acc:101119363]	protein_coding	5.98024	5.90819	5.62347	5.67537	4.7597	4.0563	8.25649	8.06841	8.01419	8.16397e-07	2.03613e-06	yes
ENSOARG00020011374	ITGA3	7817;7816	ENSOART00020017303;ENSOART00020017383	GO:0001764(neuron migration);GO:0002020(protease binding);GO:0005886(plasma membrane);GO:0007155(cell adhesion);GO:0007266(Rho protein signal transduction);GO:0007613(memory);GO:0008305(integrin complex);GO:0009897(external side of plasma membrane);GO:0009986(cell surface);GO:0016323(basolateral plasma membrane);GO:0017015(regulation of transforming growth factor beta receptor signaling pathway);…	04151(PI3K-Akt signaling pathway);04510(Focal adhesion);04512(ECM-receptor interaction);04640(Hematopoietic cell lineage);04810(Regulation of actin cytoskeleton);05165(Human papillomavirus infection);05200(Pathways in cancer);05222(Small cell lung cancer);05410(Hypertrophic cardiomyopathy);05412(Arrhythmogenic right ventricular cardiomyopathy);05414(Dilated cardiomyopathy);05414(Dilated cardiomyo…			integrin subunit alpha 3 [Source:NCBI gene (formerly Entrezgene);Acc:101118038]	protein_coding	0.371861	0.302029	0.424526	0.74618	0.493166	0.387792	0.0417995	0.105585	0	1.99583e-06	4.73943e-06	yes
ENSOARG00020014412	PRDX3	25419	ENSOART00020022011	GO:0001893(maternal placenta development);GO:0005654(nucleoplasm);GO:0005737(cytoplasm);GO:0005739(mitochondrion);GO:0005769(early endosome);GO:0005829(cytosol);GO:0005886(plasma membrane);GO:0006915(apoptotic process);GO:0006979(response to oxidative stress);GO:0007005(mitochondrion organization);GO:0008284(positive regulation of cell population proliferation);GO:0008379(thioredoxin peroxidase a…		K20011	EC:1.11.1.24;EC:1.11.1.25	peroxiredoxin 3 [Source:NCBI gene (formerly Entrezgene);Acc:101106731]	protein_coding	71.9507	72.8983	67.2278	85.2365	117.448	106.527	83.9484	80.0208	87.3387	2.68546e-06	6.28762e-06	yes
ENSOARG00020017228	PAM	36029	ENSOART00020026608	GO:0001519(peptide amidation);GO:0003824(catalytic activity);GO:0004497(monooxygenase activity);GO:0004504(peptidylglycine monooxygenase activity);GO:0004598(peptidylamidoglycolate lyase activity);GO:0005507(copper ion binding);GO:0005515(protein binding);GO:0006518(peptide metabolic process);GO:0008270(zinc ion binding);GO:0010043(response to zinc ion);GO:0016020(membrane);GO:0016715(oxidoreduct…		K24006	EC:1.14.17.3;EC:4.3.2.5	peptidylglycine alpha-amidating monooxygenase [Source:NCBI gene (formerly Entrezgene);Acc:101112815]	protein_coding	2.84587	3.3565	3.74756	1.61431	1.93132	1.77131	2.34204	2.54629	2.75357	5.21988e-06	1.18336e-05	yes
ENSOARG00020009258	BLCAP	11206	ENSOART00020014190					BLCAP apoptosis inducing factor [Source:NCBI gene (formerly Entrezgene);Acc:101103339]	protein_coding	6.88631	10.8799	6.31253	6.09307	7.46128	5.9205	1.94161	2.5252	3.21002	0.000103693	0.000199675	yes
ENSOARG00020023949	ADAM12	25530	ENSOART00020037467	GO:0004222(metalloendopeptidase activity);GO:0006508(proteolysis);GO:0008237(metallopeptidase activity)				ADAM metallopeptidase domain 12 [Source:NCBI gene (formerly Entrezgene);Acc:101106128]	protein_coding	0.353064	0.554552	0.630952	0.311761	0.358186	0.364966	0.09301	0.204882	0.13948	0.000186332	0.000345713	yes
ENSOARG00020025027	ACVR2A	21244	ENSOART00020039234	GO:0001702(gastrulation with mouth forming second);GO:0001934(positive regulation of protein phosphorylation);GO:0004672(protein kinase activity);GO:0004675(transmembrane receptor protein serine/threonine kinase activity);GO:0005524(ATP binding);GO:0005737(cytoplasm);GO:0006468(protein phosphorylation);GO:0007178(transmembrane receptor protein serine/threonine kinase signaling pathway);GO:0007283…				activin A receptor type 2A [Source:HGNC Symbol;Acc:HGNC:173]	protein_coding	6.06388	5.09938	4.9812	3.37744	2.50435	3.90791	5.22646	5.54614	4.96823	0.000248452	0.000453342	yes
ENSOARG00020003912	NLRP5	13405	ENSOART00020006022	GO:0005515(protein binding);GO:0005634(nucleus);GO:0005737(cytoplasm);GO:0005739(mitochondrion);GO:0005794(Golgi apparatus);GO:0015631(tubulin binding);GO:0043231(intracellular membrane-bounded organelle);GO:0060473(cortical granule);GO:0106333(subcortical maternal complex)				NLR family pyrin domain containing 5 [Source:HGNC Symbol;Acc:HGNC:21269]	protein_coding	9.76213	9.52196	9.1449	7.22708	4.48546	5.63774	5.48233	6.88237	8.13382	0.000326186	0.000585324	yes
ENSOARG00020021520	CDKN1C	24752	ENSOART00020033316	GO:0004860(protein kinase inhibitor activity);GO:0004861(cyclin-dependent protein serine/threonine kinase inhibitor activity);GO:0005634(nucleus);GO:0005737(cytoplasm);GO:0030511(positive regulation of transforming growth factor beta receptor signaling pathway);GO:0033673(negative regulation of kinase activity);GO:0042326(negative regulation of phosphorylation);GO:0044877(protein-containing compl…	04110(Cell cycle)			Ovis aries cyclin dependent kinase inhibitor 1C (CDKN1C), mRNA. [Source:RefSeq mRNA;Acc:NM_001142510]	protein_coding	8.9081	10.7004	10.4965	6.2843	8.79524	6.91154	12.7143	11.197	11.0041	0.000370506	0.000660155	yes
ENSOARG00020000470	KALRN	4956;4957	ENSOART00020001096;ENSOART00020001309	GO:0004672(protein kinase activity);GO:0005085(guanyl-nucleotide exchange factor activity);GO:0005515(protein binding);GO:0005524(ATP binding);GO:0006468(protein phosphorylation);GO:0007528(neuromuscular junction development);GO:0007595(lactation);GO:0007613(memory);GO:0008344(adult locomotory behavior);GO:0035176(social behavior);GO:0042711(maternal behavior);GO:0043547(positive regulation of GT…				kalirin RhoGEF kinase [Source:HGNC Symbol;Acc:HGNC:4814]	protein_coding	3.24019	3.30432	3.32533	2.85332	2.17148	2.6721	2.23697	2.37881	2.13951	0.000649544	0.0011169	yes
ENSOARG00020021141	HAVCR2	35755;35750;35754	ENSOART00020032679;ENSOART00020032591;ENSOART00020032642	GO:0001772(immunological synapse);GO:0001819(positive regulation of cytokine production);GO:0002281(macrophage activation involved in immune response);GO:0002519(natural killer cell tolerance induction);GO:0002652(regulation of tolerance induction dependent upon immune response);GO:0002826(negative regulation of T-helper 1 type immune response);GO:0002838(negative regulation of immune response to…				hepatitis A virus cellular receptor 2 [Source:HGNC Symbol;Acc:HGNC:18437]	protein_coding	0.712249	0.70941	0.870826	1.65102	1.3676	1.67524	0.305573	0.620173	0.518758	0.0007008	0.00119953	yes
ENSOARG00020015591	BTG4	13747	ENSOART00020023895	GO:0003730(mRNA 3'-UTR binding);GO:0045930(negative regulation of mitotic cell cycle);GO:0160021(maternal-to-zygotic transition of gene expression)				BTG anti-proliferation factor 4 [Source:HGNC Symbol;Acc:HGNC:13862]	protein_coding	5805.76	5488.33	5450.47	6682.86	5756.02	6277.62	5399.05	5455.51	5420.31	0.000718057	0.00122787	yes
ENSOARG00020012344	STOX2	28127;28128;28126	ENSOART00020018945;ENSOART00020018896;ENSOART00020018999	GO:0001893(maternal placenta development);GO:0006357(regulation of transcription by RNA polymerase II);GO:0009792(embryo development ending in birth or egg hatching);GO:0009792(embryo development ending in birth or egg hatching)				storkhead box 2 [Source:HGNC Symbol;Acc:HGNC:25450]	protein_coding	0.652098	0.778878	0.683245	0.426904	0.270054	0.305692	0.264024	0.358126	0.16123	0.000781748	0.00133034	yes
ENSOARG00020008054	WT1	14720;14721	ENSOART00020013680;ENSOART00020013741	GO:0000122(negative regulation of transcription by RNA polymerase II);GO:0000976(transcription cis-regulatory region binding);GO:0000978(RNA polymerase II cis-regulatory region sequence-specific DNA binding);GO:0001228(DNA-binding transcription activator activity, RNA polymerase II-specific);GO:0001658(branching involved in ureteric bud morphogenesis);GO:0001822(kidney development);GO:0005634(nuc…				WT1 transcription factor [Source:HGNC Symbol;Acc:HGNC:12796]	protein_coding	3.73633	4.90935	4.19404	4.8051	2.70471	3.96885	2.40291	2.58857	1.98827	0.00126059	0.00209189	yes
ENSOARG00020003109	MELK	19980;19978;19981	ENSOART00020005749;ENSOART00020005884;ENSOART00020005814	GO:0004672(protein kinase activity);GO:0004674(protein serine/threonine kinase activity);GO:0004715(non-membrane spanning protein tyrosine kinase activity);GO:0005509(calcium ion binding);GO:0005524(ATP binding);GO:0005737(cytoplasm);GO:0005886(plasma membrane);GO:0005938(cell cortex);GO:0006468(protein phosphorylation);GO:0006915(apoptotic process);GO:0008283(cell population proliferation);GO:00…		K08799	EC:2.7.11.1	maternal embryonic leucine zipper kinase [Source:NCBI gene (formerly Entrezgene);Acc:101108986]	protein_coding	183.669	177.442	177.353	218.296	170.301	200.712	153.922	155.745	158.38	0.00248	0.00393975	yes
ENSOARG00020021427	PHLDA2	24748	ENSOART00020033079	GO:0001890(placenta development);GO:0009887(animal organ morphogenesis);GO:0010468(regulation of gene expression);GO:0030334(regulation of cell migration);GO:0043065(positive regulation of apoptotic process);GO:0045995(regulation of embryonic development);GO:0060721(regulation of spongiotrophoblast cell proliferation);GO:0070873(regulation of glycogen metabolic process);GO:1901981(phosphatidylino…				pleckstrin homology like domain family A member 2 [Source:NCBI gene (formerly Entrezgene);Acc:105613568]	protein_coding	0.642755	0.353488	0.773508	1.76267	1.63998	3.13932	1.88749	2.12726	2.4492	0.00303447	0.00477028	yes
ENSOARG00020003485	ATP10A	17094	ENSOART00020005312	GO:0000166(nucleotide binding);GO:0000287(magnesium ion binding);GO:0005215(transporter activity);GO:0005524(ATP binding);GO:0005783(endoplasmic reticulum);GO:0005886(plasma membrane);GO:0015914(phospholipid transport);GO:0016020(membrane);GO:0016887(ATP hydrolysis activity);GO:0140326(ATPase-coupled intramembrane lipid transporter activity);GO:0140345(phosphatidylcholine flippase activity);GO:01…		K01530	EC:7.6.2.1	ATPase phospholipid transporting 10A (putative) [Source:NCBI gene (formerly Entrezgene);Acc:101107997]	protein_coding	0.959762	0.626929	0.808136	0.534099	0.518323	0.326073	0.640362	0.944533	1.06694	0.00359058	0.00558409	yes
ENSOARG00020019996	NR3C1	35560;35559	ENSOART00020030826;ENSOART00020030904	GO:0000122(negative regulation of transcription by RNA polymerase II);GO:0000977(RNA polymerase II transcription regulatory region sequence-specific DNA binding);GO:0000978(RNA polymerase II cis-regulatory region sequence-specific DNA binding);GO:0001046(core promoter sequence-specific DNA binding);GO:0001227(DNA-binding transcription repressor activity, RNA polymerase II-specific);GO:0001228(DNA…	04080(Neuroactive ligand-receptor interaction);04080(Neuroactive ligand-receptor interaction)			Ovis aries nuclear receptor subfamily 3 group C member 1 (NR3C1), mRNA. [Source:RefSeq mRNA;Acc:NM_001114186]	protein_coding	1.71917	1.76204	2.32773	1.16745	1.05106	1.41492	1.59622	1.53894	1.10449	0.032547	0.0433527	yes

## Sheet: Table S8
Table S8. Summary of maternal-to-zygotic transition of genes information in sheep oocytes
gene_id	gene_name	EntrezID	transcript_id	GO	KEGG	KO_ENTRY	EC	Description	trans_type	FPKM.LO_1	FPKM.LO_2	FPKM.LO_3	FPKM.MO_1	FPKM.MO_2	FPKM.MO_3	FPKM.SO_1	FPKM.SO_2	FPKM.SO_3	pval	qval	significant
ENSOARG00020014567	PABPN1L	11728	ENSOART00020022656	GO:0003676(nucleic acid binding);GO:0003723(RNA binding)				PABPN1 like, cytoplasmic [Source:HGNC Symbol;Acc:HGNC:37237]	protein_coding	329.385	311.525	321.751	167.893	116.588	131.795	48.3344	61.9822	63.774	4.71466e-74	5.29457e-72	yes
ENSOARG00020019195	KMT2B	12332;12333	ENSOART00020030002;ENSOART00020030336	GO:0003677(DNA binding);GO:0005515(protein binding);GO:0005634(nucleus);GO:0006355(regulation of DNA-templated transcription);GO:0008270(zinc ion binding);GO:0035097(histone methyltransferase complex);GO:0042800(histone methyltransferase activity (H3-K4 specific));GO:0044665(MLL1/2 complex);GO:0045322(unmethylated CpG binding);GO:0051568(histone H3-K4 methylation);GO:0051568(histone H3-K4 methyla…	00310(Lysine degradation);01100(Metabolic pathways);01100(Metabolic pathways)	K14959	EC:2.1.1.354	lysine methyltransferase 2B [Source:NCBI gene (formerly Entrezgene);Acc:101104086]	protein_coding	5.5426	5.33453	4.77947	3.77229	1.77558	2.49254	3.07004	3.52687	3.30297	7.27916e-06	1.62398e-05	yes
ENSOARG00020015591	BTG4	13747	ENSOART00020023895	GO:0003730(mRNA 3'-UTR binding);GO:0045930(negative regulation of mitotic cell cycle);GO:0160021(maternal-to-zygotic transition of gene expression)				BTG anti-proliferation factor 4 [Source:HGNC Symbol;Acc:HGNC:13862]	protein_coding	5805.76	5488.33	5450.47	6682.86	5756.02	6277.62	5399.05	5455.51	5420.31	0.000718057	0.00122787	yes

## Sheet: Table S9
Table S9. Summary of oocyte-secreted factors differentially expressed gene information in sheep oocytes based on the Human Protein Atlas database
Gene_name	Gene description	Uniprot	Biological process	Molecular function
WEE2	WEE2 oocyte meiosis inhibiting kinase	P0C1S8	Meiosis	Kinase; Transferase; Tyrosine-protein kinase
NPR2	Natriuretic peptide receptor 2	P20594	cGMP biosynthesis; Osteogenesis	Lyase; Receptor
PDE3A	Phosphodiesterase 3A	Q14432	-	Hydrolase
NLRP5	NLR family pyrin domain containing 5	P59047	-	-
PABPC1L	Poly(A) binding protein cytoplasmic 1 like	Q4VXU2	-	RNA-binding
REC8	REC8 meiotic recombination protein	O95072	Chromosome partition; Meiosis	-
ZAR1	Zygote arrest 1	Q86SH2	Differentiation; Oogenesis	Developmental protein; RNA-binding
ZP4	Zona pellucida glycoprotein 4	Q12836	Fertilization	Receptor
ZP2	Zona pellucida glycoprotein 2	Q05996	Fertilization	Receptor
ATM	ATM serine/threonine kinase	Q13315	Cell cycle; DNA damage	DNA-binding; Kinase; Serine/threonine-protein kinase; Transferase
AURKA	Aurora kinase A	O14965	Cell cycle; Cell division; Mitosis	Kinase; Serine/threonine-protein kinase; Transferase
BMP15	Bone morphogenetic protein 15	O95972	-	Cytokine; Growth factor
FBXO5	F-box protein 5	Q9UKT4	Cell cycle; Cell division; Mitosis; Ubl conjugation pathway	-
GDF9	Growth differentiation factor 9	O60383	-	Cytokine; Growth factor
IGF1	Insulin like growth factor 1	P05019	-	Growth factor
SIRT2	Sirtuin 2	Q8IXJ6	Autophagy; Cell cycle; Cell division; Differentiation; Immunity; Innate immunity; Meiosis; Mitosis; Neurogenesis; Transcription; Transcription regulation	Transferase
TRIP13	Thyroid hormone receptor interactor 13	Q15645	Differentiation; Meiosis; Oogenesis; Spermatogenesis	-
TUT7	Terminal uridylyl transferase 7	Q5VYS8	-	Nucleotidyltransferase; Transferase
WASHC5	WASH complex subunit 5	Q12768	Protein transport; Transport	-
YTHDC2	YTH domain containing 2	Q9H6S0	Differentiation; Meiosis; Oogenesis; Spermatogenesis	Helicase; Hydrolase; RNA-binding
NOBOX	NOBOX oogenesis homeobox	O60393	Differentiation; Oogenesis; Transcription; Transcription regulation	Developmental protein; DNA-binding
PANX1	Pannexin 1	Q96RD7	Calcium transport; Differentiation; Ion transport; Oogenesis; Transport	Calcium channel; Ion channel
PCM1	Pericentriolar material 1	Q15154	Cilium biogenesis/degradation	-
IRF8	Interferon regulatory factor 8	Q02556	Autophagy; Transcription; Transcription regulation	Activator; DNA-binding; Repressor
PGK1	Phosphoglycerate kinase 1	P00558	Glycolysis	Kinase; Transferase
SALL4	Spalt like transcription factor 4	Q9UJQ4	Transcription; Transcription regulation	DNA-binding
TDRD1	Tudor domain containing 1	Q9BXT4	Differentiation; Meiosis; RNA-mediated gene silencing; Spermatogenesis	Developmental protein

## Sheet: Table S10
Table S10. Introduction to oocyte-specific protein-coding genes based on the STRING database
Oocyte-Secreted Factors	Identifier	Domain_summary
ATM	ENSOARP00000012764	Serine-protein kinase ATM; Serine/threonine protein kinase which activates checkpoint signaling upon double strand breaks (DSBs), apoptosis and genotoxic stresses such as ionizing ultraviolet A light (UVA), thereby acting as a DNA damage sensor. Recognizes the substrate consensus sequence [ST]- Q. Phosphorylates 'Ser-139' of histone variant H2AX/H2AFX at double strand breaks (DSBs), thereby regul…
AURKA	ENSOARP00000019718	Protein kinase domain-containing protein; Belongs to the protein kinase superfamily.
BMP15	ENSOARP00000010055	Bone morphogenetic protein 15; May be involved in follicular development. Oocyte-specific growth/differentiation factor that stimulates folliculogenesis and granulosa cell (GC) growth (By similarity).
FBXO5	ENSOARP00000004240	F-box protein 5.
GDF9	ENSOARP00000014175	Growth/differentiation factor 9; Required for ovarian folliculogenesis.
IGF1	ENSOARP00000017024	Insulin-like growth factor I; The insulin-like growth factors, isolated from plasma, are structurally and functionally related to insulin but have a much higher growth-promoting activity. May be a physiological regulator of [1-14C]- 2-deoxy-D-glucose (2DG) transport and glycogen synthesis in osteoblasts. Stimulates glucose transport in bone-derived osteoblastic (PyMS) cells and is effective at mu…
NLRP5	ENSOARP00000003424	NLR family pyrin domain containing 5.
NPR2	ENSOARP00000012611	Guanylate cyclase.
PABPC1L	ENSOARP00000004898	Polyadenylate-binding protein; Binds the poly(A) tail of mRNA. Belongs to the polyadenylate-binding protein type-1 family.
PDE3A	ENSOARP00000021967	Phosphodiesterase.
REC8	ENSOARP00000020623	REC8 meiotic recombination protein.
TRIP13	ENSOARP00000017264	Thyroid hormone receptor interactor 13; Belongs to the AAA ATPase family.
TUT7	ENSOARP00000009386	Terminal uridylyl transferase 7.
WEE2	ENSOARP00000015005	Wee1-like protein kinase.
YTHDC2	ENSOARP00000017431	YTH domain containing 2.
ZAR1	ENSOARP00000018669	zf-3CxxC domain-containing protein.
ZP2	ENSOARP00000015528	Zona pellucida glycoprotein 2.
ZP4	ENSOARP00000004105	Zona pellucida glycoprotein 4.

[truncated: 3 more sheets: Table S11, Table S12, Table S13]
