# Supplementary material for: Single-Cell Transcriptome Analysis Reveals Development-Specific Networks at Distinct Antral Follicle Stages in Sheep Oocytes
Source: Preprints.org preprint supplement (doi:10.20944/preprints202311.0180.v1), 2023-11-02
Supplement: Supplementary file 2 [file supplementary]

Archive with 2 entries (2 files):
- Supplemental Figure S1-S3.pdf
- Supplemental Table S1-S13.xlsx
